1 **An essential role for dNTP homeostasis following CDK-induced**  
2 **replication stress**  
3

4 Chen-Chun Pai<sup>1\*</sup>, Kuo-Feng Hsu<sup>2</sup>, Samuel C. Durley<sup>1</sup>, , Andrea Keszthelyi<sup>3</sup>,  
5 Stephen E. Kearsey<sup>4</sup>, Charalampos Rallis<sup>5,6</sup>, Lisa K. Folkes<sup>1</sup>, Rachel  
6 Deegan<sup>1</sup>, Sarah E. Wilkins<sup>2</sup>, Sophia X. Pfister<sup>1</sup>, Nagore De León<sup>4</sup>, Christopher  
7 J. Schofield<sup>2</sup>, Jürg Bähler<sup>5</sup>, Antony M. Carr<sup>3</sup> and Timothy C. Humphrey<sup>1\*</sup>

8 <sup>1</sup>CRUK-MRC Oxford Institute for Radiation Oncology, Department of  
9 Oncology, University of Oxford, ORCRB, Roosevelt Drive, Oxford, OX3 7DQ,  
10 UK; <sup>2</sup>Chemistry Research Laboratory, Department of Chemistry, University of  
11 Oxford, Oxford, OX1 3TA, UK; <sup>3</sup>Genome Damage and Stability Centre,  
12 School of Life Sciences, University of Sussex, Falmer, Brighton, Sussex, BN1  
13 9RQ, UK; <sup>4</sup>Department of Zoology, University of Oxford, South Parks Road,  
14 Oxford, OX1 3PS, UK; <sup>5</sup>Research Department of Genetics, Evolution &  
15 Environment, University College London, London, WC1E 6BT, UK, <sup>6</sup>School of  
16 Health, Sport and Bioscience, University of East London, Stratford Campus,  
17 E15 4LZ, London, UK

18 \*To whom correspondence should be addressed

19 Email: [chen-chun.pai@oncology.ox.ac.uk](mailto:chen-chun.pai@oncology.ox.ac.uk)

20

21 Correspondence may also be addressed to

22 Email: [timothy.humphrey@oncology.ox.ac.uk](mailto:timothy.humphrey@oncology.ox.ac.uk)

23

24 Present Address: Kuo-Feng Hsu, Department of Surgery, Tri-Service General  
25 Hospital, National Defense Medical Centre, Taipei, Taiwan.

26 Running Title: Wee1 limits replication stress and genome instability

27

28 KEYWORDS: Wee1; histone H3K36 modification; *Schizosaccharomyces*

29 *pombe*; synthetic lethality, MBF, Set2, CDK

## 30 **Abstract**

31 Replication stress is a common feature of cancer cells, and thus a potentially  
32 important therapeutic target. Here we show that CDK-induced replication  
33 stress is synthetic lethal with mutations disrupting dNTP homeostasis in  
34 fission yeast. Wee1 inactivation leads to increased dNTP demand and  
35 replication stress through CDK-induced firing of dormant replication origins.  
36 Subsequent dNTP depletion leads to inefficient DNA replication, Mus81-  
37 dependent DNA damage, and to genome instability. Cells respond to this  
38 replication stress by increasing dNTP supply through Set2-dependent MBF-  
39 induced expression of Cdc22, the catalytic subunit of ribonucleotide reductase  
40 (RNR). Disrupting dNTP synthesis following Wee1 inactivation, through  
41 abrogating Set2-dependent H3K36 tri-methylation or DNA integrity checkpoint  
42 inactivation results in critically low dNTP levels, replication collapse and cell  
43 death, which can be rescued by increasing dNTP levels. These findings  
44 support a 'dNTP supply and demand' model in which maintaining dNTP  
45 homeostasis is essential to prevent replication catastrophe in response to  
46 CDK-induced replication stress.

47

48

## 49 **Introduction**

50 Replication stress, in which DNA replication forks stall, is a source of genome  
51 instability and a common feature of cancer cells (Gaillard, Garcia-Muse, &  
52 Aguilera, 2015). The ability to target such a hallmark of cancer cells is of  
53 significant therapeutic interest. Replication stress can result from multiple  
54 events including physical blockage of replication fork progression,

55 deregulation of the replication initiation or elongation complexes, or through  
56 deoxyribonucleotide triphosphate (dNTP) depletion (Dobbelstein & Sorensen,  
57 2015; Zeman & Cimprich, 2014). Cells respond to such events by triggering  
58 checkpoint dependent responses to facilitate DNA replication restart  
59 (Mazouzi, Velimezi, & Loizou, 2014). In humans ATR and CHK1 are the  
60 primary kinases responsible for replication checkpoint activity, while in fission  
61 yeast the Rad3 and Cds1 kinases play a predominant role, with Cds1 being  
62 redundant with Chk1 in this response (Boddy, Furnari, Mondesert, & Russell,  
63 1998; Feijoo et al., 2001; Flynn & Zou, 2011; Howard D. Lindsay et al., 1998).  
64 Unresponsive stalled forks can be subject to endonucleolytic cleavage by  
65 Mus81-Eme1, generating a DNA end, which is targeted for homologous  
66 recombination (HR) (Hanada et al., 2007; Roseaulin et al., 2008).

67 In fission yeast, dNTP synthesis is induced in response to replication  
68 stress and DNA damage by at least two distinct mechanisms (Guarino,  
69 Salguero, & Kearsley, 2014). Checkpoint activation promotes Ddb1-Cul4<sup>Cdt2</sup>-  
70 dependent degradation of Spd1, an inhibitor of ribonucleotide reductase  
71 (RNR), thereby promoting dNTP synthesis (Holmberg et al., 2005; Liu et al.,  
72 2005; Liu et al., 2003). In addition, checkpoint-dependent activation of the  
73 Mlul Cell Cycle Box (MCB) binding factor (MBF) complex promotes  
74 transcription of genes encoding one or more MCB domains within their  
75 promoter regions, including *cdc22*<sup>+</sup>, the catalytic subunit of RNR, thereby  
76 promoting dNTP synthesis (Dutta et al., 2008).

77 The chromatin state plays an important role in modulating  
78 transcriptional responses. Set2 is a histone methyltransferase required for  
79 histone H3 lysine 36 (H3K36) mono, di- and tri- methylation in yeast (Morris et

80 al., 2005). Various functions have been ascribed to H3K36 methylation,  
81 including DNA repair (Pai et al., 2014) and checkpoint signalling (Jha & Strahl,  
82 2014). Further, we recently described a role for Set2 in promoting dNTP  
83 synthesis in response to DNA damage and replication stress through  
84 promoting MBF-dependent transcriptional expression of *cdc22*<sup>+</sup>. Loss of Set2  
85 leads to reduced Cdc22 expression, resulting in reduced dNTP levels and  
86 consequent replication stress (Pai et al., 2017). Such roles for Set2 in  
87 maintaining genome stability help explain the tumour suppressor function of  
88 the human orthologue, SETD2.

89 Replication stress can also arise as a result of elevated CDK activity,  
90 and Cyclin E and Cyclin A are frequently overexpressed in cancers (Hwang &  
91 Clurman, 2005; Yam, Fung, & Poon, 2002). Wee1 is a negative regulator of  
92 cell cycle progression where it phosphorylates and inactivates Cdc2/CDK1  
93 kinase, thereby preventing entry into mitosis (Russell & Nurse, 1987).  
94 Inactivation of Wee1 upregulates CDK activity and promotes G2-M  
95 progression. In addition to regulating entry into mitosis, studies in mammalian  
96 cells have found that WEE1 kinase inhibition can lead to dNTP depletion  
97 through increased firing of replication origins resulting from deregulated CDK  
98 activity (Beck et al., 2012).

99 Synthetic lethality provides an opportunity to specifically target cancer  
100 cells (Chan & Giaccia, 2011). In this respect, previous studies using fission  
101 yeast identified checkpoint mutants (*rad1Δ*, *rad3Δ*, *rad9Δ*, *rad17Δ*, *hus1Δ*)  
102 that are synthetic lethal with Wee1 inactivation using a temperature sensitive  
103 allele of Wee1, *wee1-50* (al-Khodairy & Carr, 1992; Enoch, Carr, & Nurse,  
104 1992). These *wee1-50* checkpoint deficient double mutants manifest a strong

105 'cut' (cell untimely torn) phenotype in which the genetic material is mis-  
106 segregated into daughter cells, consistent with cell death arising from mitotic  
107 catastrophe (Enoch et al., 1992). Indeed, inhibitors to human WEE1 have  
108 been developed with the aim of promoting mitotic catastrophe in G1-S  
109 checkpoint deficient p53 mutant cancer cells (Hirai et al., 2009). As the  
110 synthetic lethal relationship between Wee1 inactivation and loss of Chk1 is  
111 conserved in mammalian cells (Chila et al., 2015), and because inhibitors to  
112 human WEE1, ATR and CHK1 have been developed with the aim of targeting  
113 cancer cells (Dobbelstein & Sorensen, 2015; Sørensen & Syljuåsen, 2012),  
114 understanding the mechanism by which their inactivation leads to cell death is  
115 of clinical significance.

116 In this study, we define an evolutionarily conserved role for Wee1 in  
117 preventing replication stress through suppressing CDK-induced replication  
118 origin firing, dNTP depletion and Mus81-dependent DNA damage. Further,  
119 we show that following Wee1 inactivation, Set2-dependent histone H3K36  
120 trimethylation and the DNA integrity checkpoint perform an essential role in  
121 maintaining dNTP homeostasis, thus preventing replication catastrophe.  
122 These findings provide new insights into the consequences of Wee1  
123 inactivation and its therapeutic exploitation.

124

## 125 **Results**

### 126 ***Wee1 is required for efficient S-phase progression by limiting origin*** 127 ***firing***

128 We investigated the possible role of Wee1 in regulating S-phase progression.  
129 Nitrogen starvation was used to synchronize *wee1-50* cells in G1 phase and

130 following re-feeding, cell cycle progression was monitored by flow cytometry.  
131 In wild-type cells, an increasing proportion of cells with a 2C DNA content was  
132 observed at 3 hours following re-feeding; by 5 hours, the entire population  
133 was 2C, indicating successful DNA replication (**Fig. 1a, WT**). In contrast, in  
134 *wee1-50* cells, at 3 hours after re-feeding the population exhibited a 1C peak,  
135 and even 6 hours following re-feeding there was a proportion of *wee1-50* cells  
136 with a 1C peak, indicating a delay in S-phase progression (**Fig. 1a, *wee1-50***).

137 To test whether Wee1 inactivation in fission yeast causes increased  
138 origin firing, we employed a polymerase usage sequence (Pu-seq) technique  
139 to map genome-wide origin usage as previously described (Daigaku et al.,  
140 2015). In wild-type cells, we identified 1,207 initiation sites at 34°C (threshold  
141 20 percentile, 99.9 percentile of all origins regarded as 100% efficient)  
142 including efficient (>50% usage per cell cycle), moderately efficient (25-50%),  
143 and inefficient origins (<25%) (**Fig. 1b**). In the *wee1-50* background, we  
144 mapped 1,310 origins at 36°C (**Fig. 1b**). Interestingly, analysis of the  
145 distribution of origin usage in *wee1-50* cells revealed the trend that an  
146 increased number of inefficient origins (dormant origins) were used compared  
147 to wild-type cells (**Fig. 1b**). There are a greater proportion of inefficient origins  
148 and less efficient origins in *wee1-50* cells compared to wild type (**Fig.1c**).  
149 Together, this data suggests that Wee1 inactivation causes an increase in the  
150 number of DNA replication initiation sites utilized.

151 We tested whether the increased origin firing in *wee1-50* might lead to  
152 elevated dNTP demand, thus leading to replication stress. A spot assay  
153 showed that *wee1-50* cells were sensitive to HU at the semi-restrictive  
154 temperature (**Fig. 1d and Supplementary Fig. 1a**). Deleting RNR inhibitor

155 *spd1<sup>+</sup>* in a *wee1-50* background suppressed the sensitivity of *wee1-50* cells  
156 on HU (**Fig. 1d and Supplementary Fig. 1a**) and suppressed the delayed  
157 DNA replication of *wee1-50* cells at 36°C, consistent with Wee1 inactivation  
158 impacting on dNTP levels (**Fig. 1e**). Consistent with this, we showed that the  
159 dATP/ATP level in *wee1-50* is significantly lower than wild type  
160 (**Supplementary Fig. 1b**). These findings suggest that inactivation of Wee1  
161 causes dNTP pool depletion by increased origin firing leading to replication  
162 stress.

163

### 164 ***Wee1 inactivation causes DNA damage accumulation and genome*** 165 ***instability***

166 We next tested whether disrupting Wee1 could lead to DNA damage  
167 associated with replication stress. We monitored DNA damage-induced  
168 Rad52 foci in a *wee1-50* mutant. Wee1 inactivation resulted in significantly  
169 elevated levels of Rad52 foci compared to wild-type (**Fig. 2a and 2b**). Earlier  
170 work has demonstrated that increased CDK activity promotes Mus81-Eme1  
171 endonuclease activity (Dehe et al., 2013; Dominguez-Kelly et al., 2011).  
172 Indeed, deletion of *mus81<sup>+</sup>* resulted in significantly reduced levels of Rad52-  
173 GFP DNA damage foci in a *wee1-50* background (*p* value <0.05) (**Fig. 2c and**  
174 **2d**). Thus, Wee1 inactivation leads to elevated levels of Mus81-dependent  
175 DNA damage.

176         Studies in budding yeast have shown that dNTP imbalance can cause  
177 mutagenesis and induce genome instability (Kumar et al., 2011). Therefore,  
178 we tested whether Wee1 inactivation associated with DNA damage or dNTP  
179 deregulation induces mutagenesis. We used resistance to canavanine



180 (Fraser, Neill, & Davey, 2003; Kaur, Fraser, Freyer, Davey, & Doetsch, 1999)  
181 to determine the mutation rate in wild-type and *wee1-50* backgrounds.  
182 Inactivation of Wee1 showed significantly higher mutation rates ( $p$  value  
183  $<0.05$ ) compared to wild type (**Fig. 2e** and **2f**).

184 It is known that either increasing or decreasing origin efficiency  
185 increases the loss of minichromosome Ch<sup>16</sup> due to effects on replication fork  
186 stability (Patel et al., 2008). Consistent with this, *wee1-50* cells displayed high  
187 rates of minichromosome Ch<sup>16</sup> loss at the semi-restrictive (30°C) or restrictive  
188 temperature (36°C) compared to wild-type cells (**Fig. 2g** and **2h**). Together,  
189 these results suggest that Wee1 is essential for maintaining genome stability  
190 through suppressing replication stress, which leads to DNA damage,  
191 mutagenesis, and replication fork collapse.

192

### 193 ***Loss of Set2 methyltransferase activity is synthetic lethal with wee1-50***

194 Given that the histone H3K36 methyltransferase Set2 is required for DSB  
195 repair (Pai et al., 2014) and MBF-dependent transcription in response to DNA  
196 damage (Pai et al., 2017), we tested the possibility that the double mutant  
197 *set2Δ wee1-50* would be sick due to the accumulated DNA damage caused  
198 by Wee1 inactivation (**Fig. 2a** and **2b**). Consistent with this, the *set2Δ wee1-*  
199 *50* double mutant was synthetic lethal when grown at the restrictive  
200 temperature (36°C) (**Fig. 3a**). To determine whether this synthetic lethality  
201 was dependent on the histone methyltransferase activity of Set2, *wee1-50*  
202 was crossed with a *set2* mutant (*set2-R255G*) in which the methyltransferase  
203 activity was abolished (Pai et al., 2014). The *set2-R255G wee1-50* double  
204 mutant was not viable at the restrictive temperature of 36°C (**Fig. 3b**),

205 indicating that the methyltransferase activity of Set2 is required for viability in  
206 the absence of Wee1 kinase. Accordingly, *wee1-50* was also synthetic lethal  
207 with a *H3K36R* (**Fig. 3c**). Taken together, these results imply loss of Set2-  
208 dependent H3K36 methylation is synthetic lethal with Wee1 inactivation.

209

### 210 ***Loss of H3K36 tri-methylation is synthetic lethal with wee1-50***

211 In contrast to SETD2, the human homologue, Set2 in *S. pombe*, is  
212 responsible for all three forms of H3K36 methylation (H3K36me1, 2 or 3) and  
213 thus its loss cannot be used to distinguish between methylation states (Morris  
214 et al., 2005). We therefore investigated the consequences of expressing  
215 hJMJD2A/KDM4A (here termed hJMJD2A), the human demethylase that  
216 catalyzes H3K36me3/me2 to H3K36me2/me1, under the control of the  
217 thiamine repressible (*nmf*) promoters (**Supplementary Fig. 2a and 2c**), on a  
218 plasmid in wild-type or *wee1-50* cells at the permissive or restrictive  
219 temperatures (Hillringhaus et al., 2011; Klose et al., 2006; Shin & Janknecht,  
220 2007; Whetstine et al., 2006). Moderate overexpression of hJMJD2A was  
221 synthetic sick with *wee1-50* at 36°C (**Fig. 3d**, and **Supplementary Fig. 2e**).  
222 Consistent with previous studies, expression of human JMJD2A resulted in  
223 reduction of H3K36me3 and H3K36me2 levels (**Fig. 3e**). In addition to  
224 H3K36me3 loss, expressing hJMJD2A also resulted in reduced levels of  
225 H3K9me3 (**Fig. 3e** and **Supplementary Fig. 2c**). However, as we did not  
226 observe synthetic lethality between deletion of *clr4*<sup>+</sup>, encoding the H3K9  
227 methyltransferase, and *wee1-50* (**Supplementary Fig. 3**), this indicates that  
228 H3K9me3 loss is not required for cell viability in the absence of Wee1.

229 To distinguish between loss of H3K36me3 and H3K36me2, we  
230 expressed wild-type human H3K36me2-specific demethylase  
231 JHDM1A/KDM2A/FBXL11 (hFBXL11) in wild-type or *wee1-50* cells  
232 (**Supplementary Fig. 2b, 2d and 2f**) (Tsukada et al., 2006). Accordingly, we  
233 found that expression of hFBXL11 in fission yeast resulted in significant  
234 decrease in H3K36me2 but did not affect H3K36me3 levels (**Fig. 3g**),  
235 indicating that hFBXL11 preferentially demethylates H3K36me2 *in vivo*.  
236 However, expression of hFBXL11 did not induce a significant viability loss in  
237 *wee1-50* cells at 36°C (**Fig. 3f**), and expression of hJMJD2A or hFBXL11 did  
238 not sensitize wild-type or *wee1-50* cells at the permissive temperature (**Fig.**  
239 **3d and 3f**). Collectively, these findings provide strong evidence that the  
240 histone mark H3K36me3 is required for viability in the absence of Wee1.

241

#### 242 ***set2Δ synthetic lethality with wee1-50 can be suppressed by Cdc2*** 243 ***inactivation***

244 We next explored whether Wee1 inactivation leads to synthetic lethality with  
245 *set2Δ* through elevated CDK activity or through a CDK independent function.  
246 To test this, we investigated whether we could suppress the synthetic lethality  
247 by inhibiting CDK activity. We crossed the analogue-sensitive *cdc2* mutant  
248 (*cdc2-as*) (Dischinger, Krapp, Xie, Paulson, & Simanis, 2008) with *set2Δ*  
249 *wee1-50* to create a *cdc2-as set2Δ wee1-50* triple mutant. Instead of using the  
250 ATP analogue molecule (1-NM-PP1) to inactivate Cdc2 activity, we found that  
251 the *cdc2-as* mutant exhibited modest temperature sensitivity. As shown in  
252 **Supplementary Fig. 4a**, loss of CDK activity suppressed the growth defect of  
253 *set2Δ wee1-50* mutants. Further, the triple mutant showed a plating efficiency

254 of  $87.5 \pm 1.5\%$  as compared to *set2Δ wee1-50*, which was only  $0.3 \pm 0.3\%$   
255 (**Supplementary Fig. 4b**) while *set2Δ* and *wee1-50* single mutants exhibited  
256 more than 90% plating efficiency. Collectively, these results indicate elevated  
257 CDK activity resulting from Wee1 inactivation leads to synthetic lethality in a  
258 *set2Δ wee1-50* background.

259

### 260 ***set2Δ synthetic lethality with wee1-50 results from replication*** 261 ***catastrophe***

262 Previous studies using fission yeast found that a number of checkpoint  
263 mutants (*rad1Δ*, *rad3Δ*, *rad9Δ*, *rad17Δ*, *hus1Δ*) were synthetic lethal with  
264 *wee1-50* at the restrictive temperature (al-Khodairy & Carr, 1992; Enoch et al.,  
265 1992). These double mutants exhibited a ‘cut’ (cell untimely torn) phenotype  
266 suggesting that cell death arose through mitotic catastrophe (Enoch et al.,  
267 1992). Thus, we suspected that the synthetic lethality seen in *set2Δ wee1-50*  
268 cells might be also due to premature entry into mitosis. We found that *set2Δ*  
269 *wee1-50* cells were ‘wee’, and 25.6% of *set2Δ wee1-50* cells exhibited a ‘cut’  
270 phenotype at 36°C after 5h incubation (**Fig. 4a** and **4b**). This level of cutting in  
271 *set2Δ wee1-50* cells was significantly higher than *wee1-50* cells (10%) (*p*  
272 value <0.05) (**Fig. 4a** and **4b**). Surprisingly, *set2Δ wee1-50* cells showed a  
273 striking S-phase delay even at the permissive temperature (**Fig. 4c**),  
274 suggesting inactivation of Wee1 causes more extreme DNA replication  
275 defects in *set2Δ* cells. Flow cytometry analysis showed that *set2Δ wee1-50*  
276 cells accumulated in S-phase following a shift to 36°C for 3-5 h (**Fig. 4c**). This  
277 result suggests that the observed cell death might be substantially due to a  
278 permanent replication stalling in the *set2Δ wee1-50* double mutant rather than

279 through mitotic catastrophe (**Fig. 4a** and **4b**). Nevertheless,  $72 \pm 5$  % of *set2Δ*  
280 *wee1-50* cells exhibited a 'cut' phenotype following a shift to 36°C for 24h  
281 (**Supplementary Fig. 5a** and **5b**), suggesting that the majority of *set2Δ wee1-*  
282 *50* cells eventually undergo mitotic catastrophe after long-term replication  
283 stalling.

284 To investigate whether the replication arrest was the cause of synthetic  
285 lethality in *set2Δ wee1-50* cells, double mutants were incubated at the  
286 restrictive temperature of 36°C for 5 h and the cell viability was examined by  
287 returning them to the permissive temperature of 25°C. The results showed  
288 that 66.3% of *set2Δ wee1-50* cells lost viability after shifting to the restrictive  
289 temperature for 5 h (**Fig. 4d**), in which majority of double mutants had  
290 arrested during DNA replication but only 26% of the double mutants  
291 underwent mitotic catastrophe (**Fig. 4b**), suggesting that most *set2Δ wee1-50*  
292 cells were dying in S-phase.

293 Further, we found that *set2Δ wee1-50* cells exhibited elevated levels of  
294 DNA damage compared to wild-type cells (**Fig. 4e** and **4f**), indicative of  
295 replication stress-induced DNA damage accumulation. Accordingly, *mus81<sup>+</sup>*  
296 deletion resulted in partial suppression of the *set2Δ wee1-50* synthetic  
297 lethality at 36°C (**Fig. 4g**). In this respect, as *mus81<sup>+</sup>* deletion had little effect  
298 on *set2Δ* viability, Mus81-dependent cleavage in the double mutant is likely to  
299 have arisen from Wee1 inactivation alone. In contrast, we also observed that  
300 Mus81 is required for *wee1-50* viability at 36°C. Together, these data suggest  
301 that Wee1 inactivation in a *set2Δ* background leads to elevated levels of  
302 replication fork collapse and to Mus81-dependent DNA cleavage.

303

304 ***set2Δ wee1-50 replication catastrophe results from nucleotide depletion***

305 Our data indicate that Wee1 inactivation leads to nucleotide depletion. Further,  
306 we have independently identified a role for Set2 in dNTP synthesis. We  
307 showed that dNTP levels were lower in *set2Δ* cells compared to wild type (Pai  
308 et al., 2017). We therefore tested the possibility that the *set2Δ wee1-50*  
309 synthetic lethality during S-phase was due to severe nucleotide depletion.  
310 Consistent with this, we found *set2Δ wee1-50* cells to be acutely sensitive to  
311 low levels of HU (**Fig. 5a** and **5b**). These cells exhibited elongated  
312 phenotypes with HU treatment, suggesting that the lethality of the double  
313 mutant was not due to the compromised checkpoint (**Supplementary Fig. 6**).  
314 Instead, the lethality was more likely to be due to dNTP starvation. Consistent  
315 with this, we found that Cdc22 levels (the catalytic subunit of RNR) were  
316 reduced in response to replication stress induced in a *set2Δ wee1-50* double  
317 mutant compared to a *wee1-50* mutant (**Fig. 5c**). In accordance with this  
318 observation, dNTP levels are also significantly lower in *set2Δ wee1-50* in  
319 comparison to *wee1-50* cells under replication stress at 36°C (*p* value <0.005)  
320 (**Fig. 5d**). Further, deleting *spd1<sup>+</sup>*, encoding a negative regulator of RNR  
321 (Hakansson, Dahl, Chilkova, Domkin, & Thelander, 2006; Liu et al., 2003)  
322 robustly suppressed the synthetic lethality of the *set2Δ wee1-50* double  
323 mutant at 36°C (**Fig. 5e**), indicating elevated dNTPs can suppress *set2Δ*  
324 *wee1-50* synthetic lethality. Consistent with this observation, we found that  
325 dNTP levels are higher in the *spd1Δ set2Δ wee1-50* triple mutant compared to  
326 *set2Δ wee1-50* double mutants (Fig. 5f). Together, these findings indicate that  
327 the *set2Δ wee1-50* synthetic lethality resulted from dNTP depletion, to below  
328 a critical level.

329

330 ***set2Δ wee1-50* nucleotide depletion is caused by down-regulation of the**  
331 ***transcription of MBF-dependent genes and increased origin firing***

332 We have shown that Set2 controls dNTP synthesis through regulation of MBF  
333 transcription activity (Pai et al., 2017). As part of that study we found that  
334 deletion of MBF transcriptional repressor Yox1 suppressed the prolonged S-  
335 phase in *set2Δ* cells (Pai et al., 2017). Thus, we tested whether deletion of  
336 Yox1 could suppress the lethality of the *set2Δ wee1-50* double mutant and  
337 found that the triple mutant exhibited an increase in viability (**Fig. 6a**),  
338 indicating elevated MBF transcription activity can suppress *set2Δ wee1-50*  
339 synthetic lethality, presumably due to increased dNTP pools. Consistently,  
340 deletion of MBF transcriptional repressor Nrm1 also suppressed the synthetic  
341 lethality of *set2Δ wee1-50* cells (**Fig. 6b**). Further, we tested whether Set2  
342 also affected mRNA levels of MBF-dependent genes in a *wee1-50*  
343 background. To do this, the *set2Δ wee1-50* double and *wee1-50* single  
344 mutants were grown at the restrictive temperature of 36°C for 5h and global  
345 levels of gene expression were compared using microarrays. This analysis  
346 revealed that transcription of the MBF-dependent genes *tos4<sup>+</sup>*, *cdt1<sup>+</sup>* and  
347 *mik1<sup>+</sup>* was reduced following *set2<sup>+</sup>* deletion in a *wee1-50* background, while  
348 *act1<sup>+</sup>* which is not MBF-induced, was not (**Fig. 6c**). Together, these findings  
349 support a role for Set2 in facilitating MBF transcription in response to DNA  
350 damage or replication stress resulting from Wee1 inactivation.

351 Consistent with observations above (**Fig 1a**), inactivation of Wee1 also  
352 leads to more origin firing in *set2Δ* cells (**Supplementary Fig. 7a**). We also  
353 found that partial inactivation of replication licensing factor Cdc18 (*cdc18<sup>ts</sup>* at

354 34°C) suppressed the synthetic lethality of *set2Δ wee1-50* mutants at the  
355 semi-restrictive temperature (**Supplementary Fig. 7b**), suggesting that  
356 reducing the number of active replication origins alleviates dNTP depletion in  
357 the *set2Δ wee1-50* background. No further synthetic lethality or sickness in  
358 *cdc18<sup>ts</sup> wee1-50* or *mcm4tdts wee1-50* cells at the semi-restrictive  
359 temperature suggesting replication stalling is due to dNTP depletion rather  
360 than defects in other steps of DNA replication (**Supplementary Fig. 7c**).  
361 Moreover, we did not observe synthetic sickness between Polε and Wee1  
362 inactivation, indicating that the slow S-phase in *set2Δ* cells is unlikely to be  
363 due to the defective polymerase function (**Supplementary Fig. 7d**).

364

365 ***Disrupting checkpoint-dependent dNTP synthesis with wee1-50 results***  
366 ***in replication catastrophe***

367 We and others have identified a role for the DNA damage checkpoint in  
368 inducing dNTP synthesis in response to genotoxic stress (Blaikley et al., 2014;  
369 Liu et al., 2003; Moss et al., 2010). We therefore compared the effects of  
370 inactivating Wee1 in *set2Δ* with those of *rad3Δ* or *chk1Δ* cells  
371 (**supplementary Fig. 8a, 8b and 8c**). We were unable to make the *cds1Δ*  
372 *wee1-50* double mutant as they were lethal at 25°C (**supplementary Fig. 8d**).  
373 We found that *set2Δ wee1-50* phenocopied the synthetic lethality of *rad3Δ*  
374 *wee1-50*, *hus1Δ wee1-50* or *chk1Δ wee1-50* mutants (**supplementary Fig.**  
375 **8a, 8b and 8c**). However, we found that the percentage of cells exhibiting a  
376 'cut' phenotype in *set2Δ wee1-50* cells (20%) was significantly lower  
377 compared to *rad3Δ wee1-50* (60.5%) or *chk1Δ wee1-50* (50.8%) mutants at 4  
378 or 5h ( $p$  value <0.05) (**Fig. 7a and 7b and Supplementary Fig. 9**). We also



379 monitored cell cycle profiles of *rad3Δ wee1-50* and *chk1Δ wee1-50* cells  
380 following a shift to the restrictive temperature for 5h. Surprisingly, Wee1  
381 inactivation also caused replication stalling in *rad3Δ* and *chk1Δ* cells (**Fig. 7c**).  
382 In contrast, the *tel1Δ wee1-50* double mutant did not exhibit synthetic lethality  
383 (**Supplementary Fig. 10**), consistent with the fact that *tel1Δ* cells exhibited  
384 normal S-phase and DNA damage checkpoints (Willis & Rhind, 2009).  
385 Together, the above results indicate that disrupting Wee1 causes S-phase  
386 arrest in *set2Δ*, *rad3Δ*, or *chk1Δ* cells, consistent with Wee1 playing an  
387 important role in facilitating efficient S-phase progression in fission yeast. We  
388 also examined the dNTP levels in the single and double mutants.  
389 Unexpectedly, we found that dNTP levels were increased in a *rad3Δ*, or  
390 *chk1Δ* cells compared to wild-type cells under unstressed conditions (**Fig.7d**).  
391 This may reflect a lack of DNA damage checkpoint inhibition of the MBF  
392 target genes. However, deleting *rad3<sup>+</sup>* or *chk1<sup>+</sup>* in a *wee1-50* background  
393 resulted in a significant reduction in dNTP levels compared to wild type or  
394 *wee1-50* cells (**Fig. 7d**). Therefore, these results suggest that Rad3 and Chk1  
395 play an important role in maintaining dNTP levels in the absence of Wee1.  
396 Further, we found it was possible to suppress the synthetic lethality following  
397 Wee1 inactivation in a *chk1Δ* background by deleting *spd1<sup>+</sup>* in *wee1-50 chk1Δ*  
398 cells (**Fig. 7e**). In contrast, deleting *spd1<sup>+</sup>* did not suppress the synthetic  
399 lethality of *rad3Δ wee1-50* double mutants (**Fig. 7f**), consistent with Rad3  
400 (ATR) playing additional functions in response to replication fork stalling (H. D.  
401 Lindsay et al., 1998). These findings together support an essential role for  
402 Wee1 in modulating CDK-induced replication stress, and that inactivating

403 Wee1 together with mutations that disrupt dNTP synthesis in response to  
404 genotoxic stress results in replication catastrophe.

405

## 406 **Discussion**

407 Understanding the mechanisms that can lead to replication stress, and how  
408 they can be targeted remains an important goal in cancer research. In this  
409 study, we define an evolutionarily conserved role for the CDK regulator Wee1  
410 in suppressing replication stress and dNTP depletion, thereby maintaining  
411 genome stability. Further, we demonstrate that dNTP homeostasis defects,  
412 resulting from either loss of Set2 or the DNA integrity checkpoint, are  
413 synthetic lethal with CDK-induced replication stress, resulting from Wee1  
414 inactivation. Together our results support a 'dNTP supply and demand' model,  
415 which can be exploited to target replication stress.

416 Our data indicate that Wee1 inactivation leads to elevated levels of  
417 CDK-dependent replication origin firing, resulting in an overall increase in the  
418 total number of origins being fired. This in turn leads to dNTP depletion,  
419 replication stress, Mus81-dependent DNA damage and subsequent genome  
420 instability. We found that the replication stress associated with Wee1  
421 inactivation alone, or in combination with *set2* $\Delta$ , resulted in Mus81-dependent  
422 Rad52-GFP foci formation. Such Mus81 activity is likely to have been  
423 triggered by stalled replication forks, which present as substrates for this  
424 structure-specific endonuclease (Osman, Dixon, Doe, & Whitby, 2003).  
425 Mus81 is carefully regulated during S phase and G2 to prevent it  
426 inappropriately cleaving stalled forks (Froget, Blaisonneau, Lambert, &  
427 Baldacci, 2008; Kai, Boddy, Russell, & Wang, 2005). Elevated CDK activity

428 has been shown to promote Mus81 activation through phosphorylation of  
429 Eme1 (Dehé et al., 2013) and we hypothesise that elevated levels of CDK in  
430 S phase of *wee1-50* cells contributes to the Mus81-dependent DNA damage.  
431 We also observed that Wee1 inactivation resulted in robust induction of  
432 Cdc22, the catalytic subunit of RNR, thus promoting dNTP synthesis. These  
433 findings are consistent with a major role for Wee1 in regulating CDK activity in  
434 S-phase in fission yeast (Anda, Rothe, Boye, & Grallert, 2016) and support an  
435 evolutionarily conserved role for of WEE1 in regulating dNTP usage and  
436 preventing DNA damage through regulating origin firing (Beck et al., 2012).  
437 Our findings further demonstrate that Wee1 inactivation has significant  
438 consequences for genome stability.

439 We find Wee1 inactivation together with loss of Set2-dependent  
440 histone H3K36 tri-methylation results in synthetic lethality. Our data support a  
441 key role for Set2-dependent H3K36me3 in facilitating MBF-dependent Cdc22  
442 transcription and thus promoting dNTP synthesis in response to genotoxic  
443 stress (Pai et al., 2017). Further, Set2 dependent dNTP synthesis becomes  
444 essential following Wee1 inactivation and CDK-induced dNTP depletion. In  
445 support of this, we find loss of Set2 reduces MBF-dependent Cdc22  
446 expression, the catalytic subunit of RNR, and leads to dNTP pool depletion in  
447 response to genotoxic stress. Simultaneous loss of Wee1 and Set2 leads to  
448 critically low dNTP pools and a failure to induce Cdc22 expression and to  
449 subsequently replenish dNTP levels following Wee1 inactivation. This in turn  
450 leads to cell death through replicative arrest and mitotic catastrophe.  
451 Consistent with this, we find that *set2Δ wee1-50* synthetic lethality is  
452 associated with S-phase arrest; Cdc22 expression is significantly reduced in

453 the double mutant compared to wild-type; dNTP levels are significantly  
454 reduced in the double mutant compared to *wee1-50*, and the double mutant is  
455 acutely sensitive to HU at the permissive temperature. Accordingly, the  
456 synthetic lethality can be suppressed through increasing dNTP synthesis by  
457 depleting Spd1, by increasing MBF-dependent Cdc22 expression, or by  
458 compromising replication origin licensing. The fact that *mus81<sup>+</sup>* deletion did  
459 not robustly suppress the *set2Δ wee1-50* synthetic lethality is consistent with  
460 Mus81 cleavage of collapsed forks being a downstream secondary  
461 consequence of dNTP depletion, which are the primary cause of cell death.

462 We further define a more general role for dNTP synthesis in  
463 maintaining viability in response to Wee1 inactivation. Wee1 inactivation has  
464 been previously found to be synthetic lethal with loss of Rad3 (ATR) or Chk1  
465 in both yeast and humans (al-Khodairy & Carr, 1992; Enoch et al., 1992;  
466 Srivas et al., 2016). Synthetic lethality between Wee1 and checkpoint  
467 deficient mutations has been proposed to be a consequence of mitotic  
468 catastrophe. However, our results demonstrate that, while mitotic catastrophe  
469 is observed in *rad3Δ* or *chk1Δ* checkpoint mutants following Wee1  
470 inactivation, these cells undergo prior replication arrest resulting from an  
471 insufficient dNTP supply. Importantly, the Rad3 (ATR)-dependent checkpoint  
472 pathway is required to induce dNTP synthesis following replication stress and  
473 DNA damage. DNA damage checkpoint activation leads to Cul4-Ddb1<sup>Cdt2</sup>  
474 dependent degradation of Spd1, a negative regulator of RNR to promote  
475 dNTP synthesis (Moss et al., 2010). The replication checkpoint also promotes  
476 MBF-dependent transcription of Cdc22, the catalytic subunit of RNR through  
477 Cds1-dependent phosphorylation of Yox1, which blocks the binding of this

478 negative regulator to MBF in response to replication stress (Ivanova, Gomez-  
479 Escoda, Hidalgo, & Ayte, 2011). In this respect, Set2 and the DNA integrity  
480 checkpoint function analogously to facilitate dNTP synthesis in response to  
481 both DNA damage and replication stress in fission yeast. Accordingly, we  
482 show that elevating dNTP levels by deletion of *spd1<sup>+</sup>* suppressed the  
483 synthetic lethality of both the *set2Δ wee1-50* and *chk1Δ wee1-50* mutants.  
484 That *spd1<sup>+</sup>* deletion could not suppress the synthetic lethality of *rad3Δ wee1-*  
485 *50* mutant likely reflects the fact that Rad3 (ATR) performs additional roles in  
486 replication fork restart. Together, these findings support a 'dNTP supply and  
487 demand' model in which Set2 and DNA integrity checkpoint dependent dNTP  
488 synthesis becomes essential following elevated CDK-induced origin firing and  
489 dNTP depletion, thereby preventing replication catastrophe. This model  
490 explains how Wee1 inactivation results in synthetic lethality with loss of Set2;  
491 sheds new light on the synthetic lethal relationship between loss of ATR,  
492 Chk1 and Wee1 inactivation; and further predicts that other mutations that  
493 disrupt dNTP synthesis in response to replication stress will also be synthetic  
494 lethal with Wee1 inactivation (Figure 8).

495 Our findings indicate that the S-M cell cycle checkpoint is intact in  
496 *set2Δ* cells (Pai et al., 2017), where an elongated phenotype being observed  
497 in response to hydroxyurea or bleomycin. Moreover, in contrast to *rad3Δ* or  
498 *chk1Δ*, Wee1 inactivation did not lead to rapid mitotic catastrophe in  
499 *set2Δ* cells. While *set2Δ wee1-50* cells underwent mitotic catastrophe at later  
500 time points, this may reflect a role for Set2 in promoting MBF-dependent  
501 transcription of *mik1<sup>+</sup>*, encoding Mik1 kinase, which negatively regulates Cdc2  
502 and leads to mitotic catastrophe when deleted in a *wee1-50* background

503 (Christensen, Bentley, Martinho, Nielsen, & Carr, 2000; Dutta et al., 2008;  
504 Dutta & Rhind, 2009; Lee, Enoch, & Piwnica-Worms, 1994; Lundgren et al.,  
505 1991; Ng, Anderson, White, & McInerney, 2001).

506 Based on findings described here, it was demonstrated that  
507 H3K36me3-deficient human cancers are synthetic lethal with the WEE1  
508 inhibitor AZD1775 as a result of dNTP starvation (Pfister et al., 2015). These  
509 findings are of clinical relevance as despite the frequent loss of histone  
510 H3K36me3 in multiple cancer types and its association with poor patient  
511 outcome, there is no therapy targeting H3K36me3-deficient cancer types  
512 (Forbes et al., 2015; Lawrence et al., 2014; Li et al., 2016). Moreover, our  
513 data suggests that inhibitors of ATR and CHK1 may have differential effects in  
514 cancer therapy. As inhibitors to WEE1, ATR and CHK1 are already in clinical  
515 trials (<http://www.clinicaltrials.gov>), we anticipate that our findings described  
516 here will provide important mechanistic insights into the targeting of cancers  
517 exhibiting replication stress.

518

## 519 **MATERIALS AND METHODS**

### 520 **Yeast strains, media and genetic methods**

521 The strains used in this study are listed in Supplementary Table I. Standard  
522 media and growth conditions were used. Cultures were grown in rich media  
523 (YE6S) or Edinburgh minimal media (EMM) at 32 °C with shaking, unless  
524 otherwise stated. Nitrogen starvation was carried out using EMM lacking  
525 NH<sub>4</sub>Cl.

526

### 527 **Serial dilution assay**

528 A dilution series for the indicated mutant cells was spotted onto YES plates.  
529 Plates were incubated at 25 °C, 32 °C or 36 °C for 2-3 days, as indicated,  
530 before analysis.

531

### 532 **Survival analysis**

533 Exponential cultures were obtained in liquid YE6S medium inoculated with a  
534 single colony picked from a freshly streaked (YE6S) stock plate and grown  
535 overnight at 25 °C with vigorous shaking. Exponential cells were resuspended  
536 in YE6S at a density of  $2 \times 10^7$  cells ml<sup>-1</sup>. Serial dilutions were made and 500  
537 cells were plated on YE6S plates at the restrictive temperature of 36 °C, as  
538 well as a control plate incubated at 25 °C. Plates were incubated for 2-3 days  
539 and colonies were then scored.

540

### 541 **Analysis of replication origin firing**

542 The polymerase usage sequence (Pu-seq) technique was performed as  
543 previously described (Daigaku et al., 2015). Briefly, DNA was extracted from  
544 cells grown to log phase either on 18°C or on 34°C as indicated. For 'wt'  
545 datasets two strains were used, both strains containing *rnh201* deletion  
546 together with either polymerase  $\delta$  (*cdc6-L591G*) or polymerase  $\epsilon$  (*cdc20-*  
547 *M630F*) mutations. These strains incorporate more rNTPs on the strands  
548 synthesized by the mutant polymerase. These sites can be mapped by Pu-  
549 seq. For the *wee1-50*, and *wee1-50 set2Δ* datasets the two strains also  
550 contained these mutations along with *rnh201* and *cdc6-L591G* or *cdc20-*  
551 *M630F*. The isolated DNA was then subjected to alkali treatment (0.3 M  
552 NaOH, 2h 55°C) which digested the DNA at the positions of rNTP

553 incorporation and also separated the double strands. The resulting ssDNA  
554 fragments were size selected on agarose gel (fragments between 300-500bp  
555 were isolated). These fragments were then used for creating strand specific  
556 next generation sequencing libraries and sequenced on a Next-seq Illumina  
557 platform resulting in ~10M reads form each strains. The Pu-Seq data has  
558 been uploaded to Gene Expression Omnibus (GEO); accession number  
559 GSE113747. Reads were aligned to the *Schizosaccharomyces pombe*  
560 reference sequence (<http://www.pombase.org/downloads/genome-datasets>),  
561 the reads were mapped using bowtie2 and the data was analyzed and origin  
562 positions and efficiencies were determined using the tools published and  
563 described in detail in Daigaku et al., 2015 with default variables except for the  
564 'percentile threshold for origins' option was set to 0.2 = 20th percentile.  
565 Efficient origins were determined as origins with higher than 50% efficiency  
566 and inefficient origins had less than 25% efficiency.

567

### 568 **Mini-chromosome instability assay**

569 The mini-chromosome loss assay was carried out as previously described  
570 (Allshire, Nimmo, Ekwall, Javerzat, & Cranston, 1995; Moss et al., 2010).  
571 Briefly, 500–1000 cells from individual Ade<sup>+</sup> colonies were plated on EMM  
572 plates containing low adenine (5 mg/L), incubated at 25°C, 30°C or 36°C for 3  
573 days and were stored for 48h at 4°C before being scored for the presence of  
574 sectored colonies. The number of mini-chromosome loss events per division  
575 was determined as the number of Ade<sup>-</sup> sectored colonies divided by the sum  
576 of white and sectored colonies. The experiment was performed in triplicate.

577

### 578 **The *CanR* mutation assay**



579 To analyse mutation rates, a Luria-Delbruck fluctuation analysis was  
580 performed (Luria & Delbruck, 1943). Briefly, 1 mL cultures of wild-type or  
581 *wee1-50* cells were grown in YES medium to saturation in 12-well plates at  
582 25°C. 100 µL of each culture was spotted onto PMG (-arg, -his) plates  
583 containing 100 µg/mL canavanine and incubated at 32°C for 10-12 days.  
584 Colony numbers were scored and mutation rates in culture were analysed  
585 using the FALCOR tool (<http://www.keshavsingh.org/protocols/FALCOR.html>)  
586 (Hall, Ma, Liang, & Singh, 2009). For each strain, colony data were collected  
587 from at least 30 independent cultures. Averages, standard deviations and  
588 error bars were calculated for three independent experiments.

589

### 590 **Microscopy analysis**

591 Asynchronous cell cultures were treated with 10 mM hydroxyurea (HU) at the  
592 indicated temperature before being fixed in methanol. Samples were  
593 rehydrated and stained with 4',6-diamidino-2-phenylindole (DAPI) before  
594 examination using Zeiss Axioplan 2ie microscope, Hamamatsu Orca ER  
595 camera and micromanager software. For visualization of Rad22-GFP foci,  
596 cells were incubated at 25°C or 32°C for 5 hours before being fixed and  
597 visualized as above.

598

### 599 **Protein analysis**

600 Protein extracts were made by TCA extraction and analyzed by Western  
601 blotting as described previously (Pai et al., 2014). TAP-tagged proteins were  
602 detected with peroxidase–anti-peroxidase–soluble complex (P1291, Sigma).

603 Cdc22-GFP was detected using antibody anti-GFP (11814460001, Roche),  
604 and  $\alpha$ -tubulin was detected with antibody T5168 (Sigma).

605

#### 606 **dNTP analysis**

607  $10^8$  cells were collected and washed with 2 % glucose. Cell pellets were then  
608 lysed with 50  $\mu$ l 10 % TCA and stored at  $-80^\circ\text{C}$  before HPLC analysis. On  
609 thawing, cell extracts were spun and the supernatant diluted five-fold with  
610 water. Samples were then neutralised and analysed by HPLC as described by  
611 Moss et al using a Waters e2695 autosampler. All peak areas were measured  
612 at 258 nm (Moss et al., 2010).

613

#### 614 **Microarray analysis**

615 Microarray analysis was performed as previously described (Pai et al., 2014;  
616 Rallis, Codlin, & Bahler, 2013). Experiments were conducted in duplicate with  
617 a dye swap. RNAs from two independent biological replicates have been  
618 utilised for cDNA production. Figure 6c shows average expression ratios from  
619 the two repeats. Original data are deposited in ArrayExpress; accession  
620 number E-MTAB-6795. In brief, Alexa 555- or 647-labeled cDNA was  
621 produced from the RNA, using a Superscript direct cDNA labelling system  
622 (Invitrogen) and Alexa 555 and 647 dUTP mix. cDNAs were then purified  
623 using an Invitrogen PureLink PCR Purification system and hybridized to the  
624 array using a Gene Expression Hybridization kit (Agilent). The arrays are  
625 Agilent custom-designed containing 60-mer oligonucleotides synthesized *in*  
626 *situ* containing 15,000 probes. Following hybridization for at least 17 hours,  
627 the arrays were washed using a Gene Expression Wash Buffer kit (Agilent)

628 and scanned in an Agilent Array Scanner. Signals were extracted using  
629 GenePix software.

630

631

## 632 **ACKNOWLEDGEMENTS**

633 C.C.P, K.F.H, S.C.D, A.K, A.M.C. S.E.K, C.R, L.K.F, R.D and N.D.L  
634 performed and analysed the experiments. C.C.P and T.C.H wrote the  
635 manuscript with input from all authors. Experiments in **Fig. 1** were performed  
636 by C.C.P, A.K and A.M.C; in **Fig. 2** were performed by C.C.P and S.E.K; in  
637 **Fig. 3** were performed by C.C.P, K.F.H, and C.J.S; in **Fig. 4** were performed  
638 by C.C.P and S.C.D.; in **Fig. 5** were performed by C.C.P, S.C.D and L.K.F; in  
639 **Fig. 6** were performed by C.C.P, C.R and J.B; in **Fig. 7** were performed by  
640 C.C.P, N.D.L and L.K.F.

641

## 642 **FUNDING**

643 This research was supported by the Medical Research Council (C.C.P, R.D,  
644 S.D and T.C.H); the Clarendon Scholarship (S.X.P); L.K.F is supported by  
645 Cancer Research UK; A.M.C's group is supported by European Research  
646 Council (grant 268788–SMI–DDR) and the Medical Research Council  
647 (G1100074) (A.K and A.M.C); J.B.'s group is supported by a Wellcome Trust  
648 Senior Investigator Award [grant number 095598/Z/11/Z] (C.R. and J.B.);  
649 S.E.K's group is supported by BBSRC (grant BB/K016598/1) and the Medical  
650 Research Council (MR/L016591/1); C.J.S. thanks Cancer Research UK and  
651 the Wellcome Trust for funding. K.F.H acknowledges scholarship support from  
652 the Ministry of National Defense-Medical Affairs Bureau, Taiwan.

653

654 **CONFLICT OF INTEREST**

655 The authors declare no known conflicts of interest

656

657 **RERERENCES**

- 658 al-Khodairy, F., & Carr, A. M. (1992). DNA repair mutants defining G2  
659 checkpoint pathways in *Schizosaccharomyces pombe*. *Embo J*, *11*(4),  
660 1343-1350.
- 661 Allshire, R. C., Nimmo, E. R., Ekwall, K., Javerzat, J. P., & Cranston, G.  
662 (1995). Mutations derepressing silent centromeric domains in fission  
663 yeast disrupt chromosome segregation. *Genes & Development*, *9*(2),  
664 218-233.
- 665 Anda, S., Rothe, C., Boye, E., & Grallert, B. (2016). Consequences of  
666 abnormal CDK activity in S phase. *Cell Cycle*, *15*(7), 963-973.  
667 doi:10.1080/15384101.2016.1152423
- 668 Beck, H., Nähse-Kumpf, V., Larsen, M. S. Y., O'Hanlon, K. A., Patzke, S.,  
669 Holmberg, C., . . . Sørensen, C. S. (2012). Cyclin-Dependent Kinase  
670 Suppression by WEE1 Kinase Protects the Genome through Control of  
671 Replication Initiation and Nucleotide Consumption. *Molecular and  
672 Cellular Biology*, *32*(20), 4226-4236. doi:10.1128/mcb.00412-12
- 673 Blaikley, E. J., Tinline-Purvis, H., Kasperek, T. R., Marguerat, S., Sarkar, S.,  
674 Hulme, L., . . . Humphrey, T. C. (2014). The DNA damage checkpoint  
675 pathway promotes extensive resection and nucleotide synthesis to  
676 facilitate homologous recombination repair and genome stability in  
677 fission yeast. *Nucleic Acids Research*, *42*(9), 5644-5656.  
678 doi:10.1093/nar/gku190
- 679 Boddy, M. N., Furnari, B., Mondesert, O., & Russell, P. (1998). Replication  
680 checkpoint enforced by kinases Cds1 and Chk1. *Science*, *280*(5365),  
681 909-912.
- 682 Chan, D. A., & Giaccia, A. J. (2011). Harnessing synthetic lethal interactions  
683 in anticancer drug discovery. *Nature reviews. Drug discovery*, *10*(5),  
684 351-364. doi:10.1038/nrd3374
- 685 Chila, R., Basana, A., Lupi, M., Guffanti, F., Gaudio, E., Rinaldi, A., . . .  
686 Carrassa, L. (2015). Combined inhibition of Chk1 and Wee1 as a new  
687 therapeutic strategy for mantle cell lymphoma. *Oncotarget*, *6*(5), 3394-  
688 3408. doi:10.18632/oncotarget.2583
- 689 Christensen, P. U., Bentley, N. J., Martinho, R. G., Nielsen, O., & Carr, A. M.  
690 (2000). Mik1 levels accumulate in S phase and may mediate an  
691 intrinsic link between S phase and mitosis. *Proc Natl Acad Sci U S A*,  
692 *97*(6), 2579-2584.
- 693 Daigaku, Y., Keszthelyi, A., Müller, C. A., Miyabe, I., Brooks, T., Retkute, R., .  
694 . . Carr, A. M. (2015). A global profile of replicative polymerase usage.  
695 *Nat Struct Mol Biol*, *22*(3), 192-198. doi:10.1038/nsmb.2962
- 696 Dehé, P.-M., Coulon, S., Scaglione, S., Shanahan, P., Takedachi, A.,  
697 Wohlschlegel, J. A., . . . Gaillard, P.-H. L. (2013). Regulation of Mus81–

- 698 Eme1 Holliday junction resolvase in response to DNA damage. *Nature*  
699 *Structural & Molecular Biology*, 20(5), 598-603. doi:10.1038/nsmb.2550
- 700 Dischinger, S., Krapp, A., Xie, L., Paulson, J. R., & Simanis, V. (2008).  
701 Chemical genetic analysis of the regulatory role of Cdc2p in the S.  
702 pombe septation initiation network. *J Cell Sci*, 121(Pt 6), 843-853.  
703 doi:10.1242/jcs.021584
- 704 Dobbelstein, M., & Sorensen, C. S. (2015). Exploiting replicative stress to  
705 treat cancer. *Nat Rev Drug Discov*, 14(6), 405-423.  
706 doi:10.1038/nrd4553
- 707 Dominguez-Kelly, R., Martin, Y., Koundrioukoff, S., Tanenbaum, M. E., Smits,  
708 V. A., Medema, R. H., . . . Freire, R. (2011). Wee1 controls genomic  
709 stability during replication by regulating the Mus81-Eme1  
710 endonuclease. *J Cell Biol*, 194(4), 567-579. doi:10.1083/jcb.201101047
- 711 Dutta, C., Patel, P. K., Rosebrock, A., Oliva, A., Leatherwood, J., & Rhind, N.  
712 (2008). The DNA replication checkpoint directly regulates MBF-  
713 dependent G1/S transcription. *Mol Cell Biol*, 28(19), 5977-5985.  
714 doi:10.1128/mcb.00596-08
- 715 Dutta, C., & Rhind, N. (2009). The role of specific checkpoint-induced S-  
716 phase transcripts in resistance to replicative stress. *PLoS One*, 4(9),  
717 e6944. doi:10.1371/journal.pone.0006944
- 718 Enoch, T., Carr, A. M., & Nurse, P. (1992). Fission yeast genes involved in  
719 coupling mitosis to completion of DNA replication. *Genes Dev*, 6(11),  
720 2035-2046.
- 721 Feijoo, C., Hall-Jackson, C., Wu, R., Jenkins, D., Leitch, J., Gilbert, D. M., &  
722 Smythe, C. (2001). Activation of mammalian Chk1 during DNA  
723 replication arrest: a role for Chk1 in the intra-S phase checkpoint  
724 monitoring replication origin firing. *J Cell Biol*, 154(5), 913-923.  
725 doi:10.1083/jcb.200104099
- 726 Flynn, R. L., & Zou, L. (2011). ATR: a Master Conductor of Cellular  
727 Responses to DNA Replication Stress. *Trends in biochemical sciences*,  
728 36(3), 133-140. doi:10.1016/j.tibs.2010.09.005
- 729 Forbes, S. A., Beare, D., Gunasekaran, P., Leung, K., Bindal, N., Boutselakis,  
730 H., . . . Campbell, P. J. (2015). COSMIC: exploring the world's  
731 knowledge of somatic mutations in human cancer. *Nucleic Acids*  
732 *Research*, 43(Database issue), D805-811. doi:10.1093/nar/gku1075
- 733 Fraser, J. L., Neill, E., & Davey, S. (2003). Fission yeast Uve1 and Apn2  
734 function in distinct oxidative damage repair pathways in vivo. *DNA*  
735 *Repair (Amst)*, 2(11), 1253-1267.
- 736 Froget, B., Blaisonneau, J., Lambert, S., & Baldacci, G. (2008). Cleavage of  
737 stalled forks by fission yeast Mus81/Eme1 in absence of DNA  
738 replication checkpoint. *Mol Biol Cell*, 19(2), 445-456.  
739 doi:10.1091/mbc.E07-07-0728
- 740 Gaillard, H., Garcia-Muse, T., & Aguilera, A. (2015). Replication stress and  
741 cancer. *Nat Rev Cancer*, 15(5), 276-289. doi:10.1038/nrc3916
- 742 Guarino, E., Salguero, I., & Kearsley, S. E. (2014). Cellular regulation of  
743 ribonucleotide reductase in eukaryotes. *Seminars in Cell &*  
744 *Developmental Biology*, 30, 97-103. doi:10.1016/j.semcd.2014.03.030
- 745 Hakansson, P., Dahl, L., Chilkova, O., Domkin, V., & Thelander, L. (2006).  
746 The Schizosaccharomyces pombe replication inhibitor Spd1 regulates  
747 ribonucleotide reductase activity and dNTPs by binding to the large

- 748 Cdc22 subunit. *J Biol Chem*, 281(3), 1778-1783.  
749 doi:10.1074/jbc.M511716200
- 750 Hall, B. M., Ma, C. X., Liang, P., & Singh, K. K. (2009). Fluctuation analysis  
751 CalculatOR: a web tool for the determination of mutation rate using  
752 Luria-Delbruck fluctuation analysis. *Bioinformatics*, 25(12), 1564-1565.  
753 doi:10.1093/bioinformatics/btp253
- 754 Hanada, K., Budzowska, M., Davies, S. L., van Drunen, E., Onizawa, H.,  
755 Beverloo, H. B., . . . Kanaar, R. (2007). The structure-specific  
756 endonuclease Mus81 contributes to replication restart by generating  
757 double-strand DNA breaks. *Nat Struct Mol Biol*, 14(11), 1096-1104.  
758 doi:10.1038/nsmb1313
- 759 Hillringhaus, L., Yue, W. W., Rose, N. R., Ng, S. S., Gileadi, C., Loenarz, C., .  
760 . . Oppermann, U. (2011). Structural and evolutionary basis for the dual  
761 substrate selectivity of human KDM4 histone demethylase family. *J Biol*  
762 *Chem*, 286(48), 41616-41625. doi:10.1074/jbc.M111.283689
- 763 Hirai, H., Iwasawa, Y., Okada, M., Arai, T., Nishibata, T., Kobayashi, M., . . .  
764 Kotani, H. (2009). Small-molecule inhibition of Wee1 kinase by MK-  
765 1775 selectively sensitizes p53-deficient tumor cells to DNA-damaging  
766 agents. *Mol Cancer Ther*, 8(11), 2992-3000. doi:10.1158/1535-  
767 7163.mct-09-0463
- 768 Holmberg, C., Fleck, O., Hansen, H. A., Liu, C., Slaaby, R., Carr, A. M., &  
769 Nielsen, O. (2005). Ddb1 controls genome stability and meiosis in  
770 fission yeast. *Genes Dev*, 19(7), 853-862. doi:10.1101/gad.329905
- 771 Hwang, H. C., & Clurman, B. E. (2005). Cyclin E in normal and neoplastic cell  
772 cycles. *Oncogene*, 24(17), 2776-2786. doi:10.1038/sj.onc.1208613
- 773 Ivanova, T., Gomez-Escoda, B., Hidalgo, E., & Ayte, J. (2011). G1/S  
774 transcription and the DNA synthesis checkpoint: common regulatory  
775 mechanisms. *Cell Cycle*, 10(6), 912-915. doi:10.4161/cc.10.6.14963
- 776 Jha, D. K., & Strahl, B. D. (2014). An RNA polymerase II-coupled function for  
777 histone H3K36 methylation in checkpoint activation and DSB repair.  
778 *Nat Commun*, 5. doi:10.1038/ncomms4965
- 779 Kai, M., Boddy, M. N., Russell, P., & Wang, T. S. F. (2005). Replication  
780 checkpoint kinase Cds1 regulates Mus81 to preserve genome integrity  
781 during replication stress. *Genes & Development*, 19(8), 919-932.  
782 doi:10.1101/gad.1304305
- 783 Kaur, B., Fraser, J. L. A., Freyer, G. A., Davey, S., & Doetsch, P. W. (1999). A  
784 Uve1p-Mediated Mismatch Repair Pathway in *Schizosaccharomyces*  
785 *pombe*. *Molecular and Cellular Biology*, 19(7), 4703-4710.
- 786 Klose, R. J., Yamane, K., Bae, Y., Zhang, D., Erdjument-Bromage, H.,  
787 Tempst, P., . . . Zhang, Y. (2006). The transcriptional repressor  
788 JHDM3A demethylates trimethyl histone H3 lysine 9 and lysine 36.  
789 *Nature*, 442(7100), 312-316. doi:10.1038/nature04853
- 790 Kumar, D., Abdulovic, A. L., Viberg, J., Nilsson, A. K., Kunkel, T. A., &  
791 Chabes, A. (2011). Mechanisms of mutagenesis in vivo due to  
792 imbalanced dNTP pools. *Nucleic Acids Research*, 39(4), 1360-1371.  
793 doi:10.1093/nar/gkq829
- 794 Lawrence, M. S., Stojanov, P., Mermel, C. H., Robinson, J. T., Garraway, L.  
795 A., Golub, T. R., . . . Getz, G. (2014). Discovery and saturation analysis  
796 of cancer genes across 21 tumour types. *Nature*, 505(7484), 495-501.  
797 doi:10.1038/nature12912

- 798 Lee, M. S., Enoch, T., & Piwnica-Worms, H. (1994). mik1+ encodes a tyrosine  
799 kinase that phosphorylates p34cdc2 on tyrosine 15. *Journal of*  
800 *Biological Chemistry*, 269(48), 30530-30537.
- 801 Li, J., Duns, G., Westers, H., Sijmons, R., van den Berg, A., & Kok, K. (2016).  
802 SETD2: an epigenetic modifier with tumor suppressor functionality.  
803 *Oncotarget*, 7, 50719. doi:10.18632/oncotarget.9368
- 804 Lindsay, H. D., Griffiths, D. J., Edwards, R. J., Christensen, P. U., Murray, J.  
805 M., Osman, F., . . . Carr, A. M. (1998). S-phase-specific activation of  
806 Cds1 kinase defines a subpathway of the checkpoint response in  
807 *Schizosaccharomyces pombe*. *Genes & Development*, 12(3), 382-395.
- 808 Lindsay, H. D., Griffiths, D. J. F., Edwards, R. J., Christensen, P. U., Murray,  
809 J. M., Osman, F., . . . Carr, A. M. (1998). S-phase-specific activation of  
810 Cds1 kinase defines a subpathway of the checkpoint response in  
811 *Schizosaccharomyces pombe*. *Genes Dev*, 12(3), 382-395.
- 812 Liu, C., Poitelea, M., Watson, A., Yoshida, S. H., Shimoda, C., Holmberg, C., .  
813 . . Carr, A. M. (2005). Transactivation of *Schizosaccharomyces pombe*  
814 cdt2+ stimulates a Pcu4-Ddb1-CSN ubiquitin ligase. *EMBO Journal*,  
815 24(22), 3940-3951. doi:10.1038/sj.emboj.7600854
- 816 Liu, C., Powell, K. A., Mundt, K., Wu, L., Carr, A. M., & Caspari, T. (2003).  
817 Cop9/signalosome subunits and Pcu4 regulate ribonucleotide  
818 reductase by both checkpoint-dependent and -independent  
819 mechanisms. *Genes & Development*, 17(9), 1130-1140.  
820 doi:10.1101/gad.1090803
- 821 Lundgren, K., Walworth, N., Booher, R., Dembski, M., Kirschner, M., & Beach,  
822 D. (1991). mik1 and wee1 cooperate in the inhibitory tyrosine  
823 phosphorylation of cdc2. *Cell*, 64(6), 1111-1122.
- 824 Luria, S. E., & Delbruck, M. (1943). Mutations of Bacteria from Virus  
825 Sensitivity to Virus Resistance. *Genetics*, 28(6), 491-511.
- 826 Mazouzi, A., Velimezi, G., & Loizou, J. I. (2014). DNA replication stress:  
827 causes, resolution and disease. *Exp Cell Res*, 329(1), 85-93.  
828 doi:10.1016/j.yexcr.2014.09.030
- 829 Morris, S. A., Shibata, Y., Noma, K., Tsukamoto, Y., Warren, E., Temple, B., .  
830 . . Strahl, B. D. (2005). Histone H3 K36 methylation is associated with  
831 transcription elongation in *Schizosaccharomyces pombe*. *Eukaryot*  
832 *Cell*, 4(8), 1446-1454. doi:10.1128/ec.4.8.1446-1454.2005
- 833 Moss, J., Tinline-Purvis, H., Walker, C. A., Folkes, L. K., Stratford, M. R.,  
834 Hayles, J., . . . Humphrey, T. C. (2010). Break-induced ATR and Ddb1-  
835 Cul4(Cdt)(2) ubiquitin ligase-dependent nucleotide synthesis promotes  
836 homologous recombination repair in fission yeast. *Genes Dev*, 24(23),  
837 2705-2716. doi:10.1101/gad.1970810
- 838 Ng, S. S., Anderson, M., White, S., & McNerny, C. J. (2001). mik1(+) G1-S  
839 transcription regulates mitotic entry in fission yeast. *FEBS Letters*,  
840 503(2-3), 131-134.
- 841 Osman, F., Dixon, J., Doe, C. L., & Whitby, M. C. (2003). Generating  
842 crossovers by resolution of nicked Holliday junctions: a role for Mus81-  
843 Eme1 in meiosis. *Molecular Cell*, 12(3), 761-774.
- 844 Pai, C. C., Deegan, R. S., Subramanian, L., Gal, C., Sarkar, S., Blaikley, E. J.,  
845 . . . Humphrey, T. C. (2014). A histone H3K36 chromatin switch  
846 coordinates DNA double-strand break repair pathway choice. *Nat*  
847 *Commun*, 5, 4091. doi:10.1038/ncomms5091

- 848 Pai, C. C., Kishkevich, A., Deegan, R. S., Keszthelyi, A., Folkes, L., Kearsey,  
849 S. E., . . . Humphrey, T. C. (2017). Set2 Methyltransferase Facilitates  
850 DNA Replication and Promotes Genotoxic Stress Responses through  
851 MBF-Dependent Transcription. *Cell Rep*, 20(11), 2693-2705.  
852 doi:10.1016/j.celrep.2017.08.058
- 853 Patel, P. K., Kommajosyula, N., Rosebrock, A., Bensimon, A., Leatherwood,  
854 J., Bechhoefer, J., & Rhind, N. (2008). The Hsk1(Cdc7) Replication  
855 Kinase Regulates Origin Efficiency. *Molecular Biology of the Cell*,  
856 19(12), 5550-5558. doi:10.1091/mbc.E08-06-0645
- 857 Pfister, S. X., Markkanen, E., Jiang, Y., Sarkar, S., Woodcock, M., Orlando,  
858 G., . . . Humphrey, T. C. (2015). Inhibiting WEE1 Selectively Kills  
859 Histone H3K36me3-Deficient Cancers by dNTP Starvation. *Cancer*  
860 *Cell*, 28(5), 557-568. doi:10.1016/j.ccell.2015.09.015
- 861 Rallis, C., Codlin, S., & Bahler, J. (2013). TORC1 signaling inhibition by  
862 rapamycin and caffeine affect lifespan, global gene expression, and  
863 cell proliferation of fission yeast. *Aging cell*, 12(4), 563-573.  
864 doi:10.1111/accel.12080
- 865 Roseaulin, L., Yamada, Y., Tsutsui, Y., Russell, P., Iwasaki, H., & Arcangioli,  
866 B. (2008). Mus81 is essential for sister chromatid recombination at  
867 broken replication forks. *Embo j*, 27(9), 1378-1387.  
868 doi:10.1038/emboj.2008.65
- 869 Russell, P., & Nurse, P. (1987). Negative regulation of mitosis by wee1+, a  
870 gene encoding a protein kinase homolog. *Cell*, 49(4), 559-567.
- 871 Shin, S., & Janknecht, R. (2007). Diversity within the JMJD2 histone  
872 demethylase family. *Biochem Biophys Res Commun*, 353(4), 973-977.  
873 doi:10.1016/j.bbrc.2006.12.147
- 874 Sørensen, C. S., & Syljuåsen, R. G. (2012). Safeguarding genome integrity:  
875 the checkpoint kinases ATR, CHK1 and WEE1 restrain CDK activity  
876 during normal DNA replication. *Nucleic Acids Research*, 40(2), 477-  
877 486. doi:10.1093/nar/gkr697
- 878 Srivas, R., Shen, J. P., Yang, C. C., Sun, S. M., Li, J., Gross, A. M., . . .  
879 Ideker, T. (2016). A Network of Conserved Synthetic Lethal  
880 Interactions for Exploration of Precision Cancer Therapy. *Molecular*  
881 *Cell*, 63(3), 514-525. doi:10.1016/j.molcel.2016.06.022
- 882 Tsukada, Y., Fang, J., Erdjument-Bromage, H., Warren, M. E., Borchers, C.  
883 H., Tempst, P., & Zhang, Y. (2006). Histone demethylation by a family  
884 of JmjC domain-containing proteins. *Nature*, 439(7078), 811-816.  
885 doi:10.1038/nature04433
- 886 Whetstine, J. R., Nottke, A., Lan, F., Huarte, M., Smolikov, S., Chen, Z., . . .  
887 Shi, Y. (2006). Reversal of histone lysine trimethylation by the JMJD2  
888 family of histone demethylases. *Cell*, 125(3), 467-481.  
889 doi:10.1016/j.cell.2006.03.028
- 890 Willis, N., & Rhind, N. (2009). Mus81, Rhp51(Rad51), and Rqh1 Form an  
891 Epistatic Pathway Required for the S-Phase DNA Damage Checkpoint.  
892 *Molecular Biology of the Cell*, 20(3), 819-833. doi:10.1091/mbc.E08-08-  
893 0798
- 894 Yam, C. H., Fung, T. K., & Poon, R. Y. (2002). Cyclin A in cell cycle control  
895 and cancer. *Cell Mol Life Sci*, 59(8), 1317-1326.
- 896 Zeman, M. K., & Cimprich, K. A. (2014). Causes and consequences of  
897 replication stress. *Nature Cell Biology*, 16(1), 2-9. doi:10.1038/ncb2897



898

899

900 **FIGURE LEGENDS**

901 **Figure 1** Wee1 suppresses dormant origin firing and dNTP depletion. **(a)**

902 Wee1 is required for efficient DNA replication. Log phase wild-type or *wee1-*

903 *50* cells were blocked in G1 phase by nitrogen starvation in EMM-N for 16h at

904 25°C. Cells were released from the G1 block by re-suspending in EMM+N at

905 36°C. Samples were collected at the indicated time points for FACS analysis.

906 The red dashed line box indicates the delayed S phase progression in *wee1-*

907 *50* cells. **(b)** Wee1 suppresses inefficient origin firing. The genome-wide plot

908 of origin usage in *wee1-50* cells in comparison with wild-type cells at 34°C.

909 Origin efficiencies were calculated from Pu-seq data [25]. The sequencing

910 experiment was performed once and therefore it is not possible to perform a

911 statistical analysis. **(c)** The quantification of the frequency of origin usage

912 (efficiency) in asynchronous wild-type and *wee1-50* cells at 34°C. **(d)** Spd1

913 depletion suppresses the sensitivity of *wee1-50* cells to HU. WT and *wee1-50*

914 cells were serially diluted and spotted onto YES plates containing 10mM HU

915 and incubated at 32°C for 2-3 days. **(e)** Deletion of *spd1*<sup>+</sup> promotes S-phase

916 progression in *wee1-50* cells. Wild-type, *spd1Δ*, *wee1-50* and *spd1Δ wee1-50*

917 cells were arrested in G1 by nitrogen starvation, released and samples taken

918 at time points indicated and subjected to FACS analysis.

919

920 **Figure 2** Wee1 inactivation causes DNA damage, increases mutation rates

921 and leads to Ch<sup>16</sup> loss. **(a)** Examination of Rad52-GFP foci in WT or *wee1-50*

922 cells at 25°C or 32°C. Cells were grown to log phase at the permissive

923 temperature before transferring to the semi-permissive temperature for 5h.

924 Samples were fixed directly in methanol/acetone and examined by  
925 fluorescence microscopy. **(b)** The percentage of cells containing Rad52-GFP  
926 foci in the indicated strains is shown. A total of >100 cells were counted in  
927 each experimental group in two independent experiments (\*\* *t* test,  $p < 0.01$ ).  
928 **(c)** A similar experiment was carried out as described in **(a)**, except a *wee1-50*  
929 *mus81Δ rad52-GFP* stain was used. **(d)** Quantification analysis of *wee1-50*  
930 *mus81Δ* cells with Rad52-GFP foci compared to *wee1-50* cells. A total of  
931 >100 cells were counted in each experimental group in two independent  
932 experiments (\* *t* test,  $p < 0.05$ ). **(e)** *wee1-50* cells exhibit elevated mutation  
933 rates to Can<sup>r</sup> compared to wild-type cells. Cell cultures incubated on  
934 canavanine plates at 32°C for 10 days produced Can<sup>r</sup> mutant colonies.  
935 Colony data were collected from 36 independent cultures. The mutation rates  
936 for WT and *wee1-50* strains were calculated using the MSS statistical method.  
937 The mutation rates and error bars are shown (averages of  $n \geq 2$  experiments,  
938 \* *t* test,  $p < 0.05$ ). **(f)** The images presented are representative of experiments  
939 performed in **(e)** at least three times. **(g)** Schematic of the Ch<sup>16</sup> strain. Ch<sup>16</sup>,  
940 ChIII, centromeric regions (ovals), complementary heteroalleles (*ade6-M216*  
941 and *ade6-M210*). **(h)** Elevated Ch<sup>16</sup> loss rates associated with Wee1  
942 inactivation. Wild-type or *wee1-50* cells containing the mini-chromosome are  
943 *ade*<sup>+</sup>. Cells were plated on YES or adenine-limiting plates and the percentage  
944 of Ch<sup>16</sup> loss events per division was determined ( $n > 500$  cells for each data  
945 point, \*\* *t* test,  $p < 0.01$ ). The data presented are from at least two independent  
946 biological repeats.  
947

948 **Figure 3** Loss of Set2-dependent H3K36 methylation is synthetic lethal with  
949 *wee1-50*. (a) WT, *set2Δ*, *wee1-50* and *set2Δ wee1-50* cells were serially  
950 diluted and spotted onto YES plates and incubated at indicated temperatures  
951 for 2-3 days. (b) WT, *set2-R255G*, *wee1-50* and *set2-R255G wee1-50* cells  
952 were serially diluted and spotted onto YES plates and incubated at indicated  
953 temperatures for 2-3 days. (c) *H3ΔΔ*, *wee1-50*, *H3K36R*, *H3K36R wee1-50*  
954 cells were serially diluted and spotted onto YES plates and incubated at  
955 indicated temperatures for 2-3 days. (d) Serial dilutions of wild-type cells (WT)  
956 expression empty vector *pREP41x* or *pREP41x-JMJD2A*, and *wee1-50*  
957 mutants expressing empty vector *pREP41x* or *pREP41x-JMJD2A*.  
958 Transformants were serially diluted and spotted onto EMM minus Leucine in  
959 the absence of thiamine at 25°C or 36°C. (e) Western blotting analysis of  
960 H3K9me3, H3K36me3, H3K36me2 and H3K36me1 in wild type (WT)  
961 containing *pREP41x* or *pREP41x-JMJD2A* and *set2Δ* cells. H3 is shown as a  
962 loading control. (f) Serial dilutions of wild-type cells (WT) expression empty  
963 vector *pREP41x* or *pREP41x-FBXL11*, and *wee1-50* mutants expressing  
964 empty vector *pREP41x* or *pREP41x-FBXL11*. Transformants were serially  
965 diluted and spotted onto EMM minus Leucine in the absence of thiamine at  
966 25°C or 36°C. (g) Western blotting analysis of H3K36me3 and H3K36me2 in  
967 wild type (WT) containing *pREP41x* or *pREP41x-FBXL11* and *set2Δ* cells. H3  
968 is shown as a loading control.

969

970 **Figure 4** *set2Δ* synthetic lethality with *wee1-50* results from replication  
971 catastrophe. (a) Inactivation of Wee1 in *set2Δ* cells results in premature entry  
972 into mitosis. *wee1-50* or *set2Δ wee1-50* cells were grown to log phase at

973 permissive temperature (25°C), then incubated at 36°C to inactivate Wee1.  
974 Samples were fixed with 70% ethanol at indicated times. The fixed cells were  
975 stained with DAPI and examined by microscopy analysis. **(b)** Quantitative  
976 analysis of cells in **(a)**. Asterisks represent significant differences ( $n \geq 2$   
977 experiments for each genotype,  $n > 200$  cells for each data point; \*\*  $t$  test,  
978  $p < 0.01$ ). The data presented are from at least two independent biological  
979 repeats. **(c)** A wild-type, *wee1-50*, *set2Δ* or *set2Δ wee1-50* strain was grown  
980 to log phase at the permissive temperature 25°C then transferred to 36°C for  
981 the times shown. At the indicated times, cells were processed for FACS  
982 analysis. **(d)** WT, *set2Δ*, *wee1-50* and *set2Δ wee1-50* cells from the 5h time  
983 point in **(c)** were collected, plated on the YES medium and incubated at 25°C  
984 for 3-4 days for viability analysis. ( $n \geq 2$  experiments for each genotype,  
985  $n > 500$  cells for each data point; \*\*  $t$  test  $p < 0.01$ ,  $t$  test between WT and *set2Δ*  
986 *wee1-50* cells:  $p$ -value = 0.0031). **(e)** Examination of Rad52-GFP foci in WT,  
987 *set2Δ*, *wee1-50* or *set2Δ wee1-50* cells at 25°C or 32°C. Cells were grown to  
988 log phase at the permissive temperature before transferring to the semi-  
989 permissive temperature for 5h. Samples were fixed directly in  
990 methanol/acetone and examined by fluorescence microscopy. **(f)** The  
991 percentage of cells containing Rad52-GFP foci in the indicated strains is  
992 shown. Asterisks represent significant differences (\*\*  $t$  test  $p < 0.01$ ; averages  
993 of  $n \geq 2$  experiments,  $n \geq 100$  cells for each data point). **(g)** Deletion of *mus81+*  
994 partially suppresses the synthetic lethality of *set2Δ wee1-50* cells at 36°C.  
995  
996 **Figure 5** synthetic lethality of *set2Δ wee1-50* results from dNTP depletion. **(a)**  
997 *set2Δ wee1-50* cells are sensitive to low levels of HU. WT, *set2Δ*, *wee1-50*

998 and *set2Δ wee1-50* cells were serially diluted and spotted onto YES plates  
999 containing 5mM HU and incubated at the permissive temperature (25°C) for  
1000 3-4 days. **(b)** Quantification of the viability of wild-type and *set2Δ wee1-50*  
1001 cells on YES plates at 25°C containing different concentrations of HU as  
1002 indicated (\*\* *t* test  $p < 0.01$ ; averages of  $n \geq 2$  experiments,  $n \geq 500$  cells for  
1003 each data point). **(c)** The protein levels of Cdc22 were examined in *wee1-50*  
1004 and *set2Δ wee1-50* cells following incubation at 36°C for 4h. Samples of cells  
1005 were taken at the indicated time points and cell extracts were made using  
1006 TCA method. Cdc22 was detected using an antibody against the CFP tag.  $\alpha$ -  
1007 tubulin is shown as a loading control. **(d)** dNTP levels were measured in wt,  
1008 *wee1-50*, *set2Δ* and *set2Δ wee1-50* strains. Cells were grown to log phase at  
1009 25°C followed by 5h incubation at 36°C. Samples of cells were collected and  
1010 re-suspended in 10% TCA for subsequent HPLC analysis following  
1011 neutralisation. Means  $\pm$  standard errors of three experiments are shown. Stars  
1012 denote statistical significance (\* *t* test  $p < 0.05$ , \*\* *t* test  $p < 0.01$ ). **(e)** *spd1Δ*  
1013 suppresses the synthetic lethality of *set2Δ wee1-50*. Strains were serially  
1014 diluted and spotted onto YES plates and incubated at indicated temperatures  
1015 for 2-3 days. **(f)** dNTP levels were measured in *set2Δ wee1-50* and *spd1Δ*  
1016 *set2Δ wee1-50* strains. Cells were grown to log phase at 25°C followed by a  
1017 5h incubation at 36°C. Samples of cells were collected and re-suspended in  
1018 10% TCA for subsequent HPLC analysis following neutralisation. The mean  $\pm$   
1019 standard error for three experiments are shown. Asterisk(s) represents  
1020 significant differences (\*\* *t* test  $p < 0.01$ , *t* test between *set2Δ wee1-50* and  
1021 *spd1Δ set2Δ wee1-50* strains; *p*-values: dCTP=0.3288, dGTP=0.0065,

1022 dTTP=0.0042, dATP=0.0011). The data presented are from three  
1023 independent biological repeats.

1024

1025 **Figure 6** Set2 is required for MBF-dependent gene expression in *wee1-50*  
1026 cells. (a) *yox1Δ* suppresses the synthetic lethality of *set2Δ wee1-50*. Strains  
1027 were serially diluted and spotted onto YES plates and incubated at 25°C or  
1028 36°C for 2-3 days. (b) *nrm1Δ* suppresses the synthetic lethality of *set2Δ*  
1029 *wee1-50*. Strains were serially diluted and spotted onto YES plates and  
1030 incubated at 25°C or 36°C for 2-3 days. (c) *tos4<sup>+</sup>*, *mik1<sup>+</sup>*, *cdt1<sup>+</sup>*, and *rep2<sup>+</sup>*  
1031 transcript levels in *set2Δ wee1-50* cells relative to *wee1-50* where the  
1032 expression level in *wee1-50* cells is 1.0. Data were calculated from two  
1033 biological repeats. *act1<sup>+</sup>* was shown as an MBF-independent control.

1034

1035 **Figure 7** *rad3Δ* and *chk1Δ* are synthetic lethal with *wee1-50* through  
1036 replication stress. (a) *set2Δ wee1-50*, *rad3Δ wee1-50* or *chk1Δ wee1-50*  
1037 result in premature entry into mitosis but the “cut” phenotype in the *set2Δ*  
1038 *wee1-50* mutant is significantly lower at early time points. *set2Δ wee1-50*,  
1039 *rad3Δ wee1-50* or *chk1Δ wee1-50* cells were grown to log phase at  
1040 permissive temperature (25°C), then incubated at 36°C to inactivate Wee1.  
1041 Samples were fixed with 70% ethanol at indicated times. The fixed cells were  
1042 stained with DAPI and examined by microscopy analysis. (b) Quantitative  
1043 analysis of cells in (a) Means ± standard errors are shown. Black asterisks  
1044 indicates statistically significant differences between *rad3Δ wee1-50* cells  
1045 grown at either 36°C or 25°C (\*\* *t* test *p*<0.01, *t* test *p*-values for *rad3Δ wee1-*  
1046 *50* cells: 4h=0.0017, 5h=0.0003; averages of *n* ≥ 2 experiments, *n* ≥100 cells

1047 for each data point) ; blue asterisks indicates statistically significant  
1048 differences between *chk1Δ wee1-50* cells grown at either 36°C or 25°C (\*\* *t*  
1049 test  $p < 0.01$ , *t* test *p*-values for *chk1Δ wee1-50* cells: 4h=0.0006, 5h=0.0006;  
1050 averages of  $n \geq 2$  experiments,  $n \geq 100$  cells for each data point); orange  
1051 asterisks indicates statistically significant differences between *set2Δ wee1-50*  
1052 cells grown at 36°C or 25°C (\*\* *t* test  $p < 0.01$ , *t* test *p*-values for *set2Δ wee1-*  
1053 *50* cells: 4h=0.0002, 5h=0.0078; averages of  $n \geq 2$  experiments,  $n \geq 100$  cells  
1054 for each data point).(c) Wee1 inactivation causes replication stress in *rad3Δ*  
1055 or *chk1Δ* mutants. Flow cytometric analysis of wild-type, *rad3Δ*, *chk1Δ*, *rad3Δ*  
1056 *wee1-50* or *chk1Δ wee1-50* cells at 25°C or 36°C at indicated time points. (d)  
1057 dNTP levels were measured in wild-type, *wee1-50*, *rad3Δ wee1-50* and *chk1Δ*  
1058 *wee1-50* strains. These strains were grown to log phase at 25°C following by  
1059 5h incubation at 36°C. Samples of cells were collected and re-suspended in  
1060 10% TCA for HPLC analysis. Means  $\pm$  standard errors of three biological  
1061 repeats are shown. Asterisks (\*) indicate statistically significant differences as  
1062 indicated ( $p < 0.05$ , *t* test). (e) Total dNTP levels are reduced in *wee1-50*,  
1063 *rad3Δ wee1-50* or *chk1 Δ wee1-50* cells compared to wild-type cells.  
1064 Asterisks (\*) indicate statistically significant differences (\*\* *t* test  $p < 0.01$ , *t* test  
1065 *p*-values: *wee1-50*=0.0012, *rad3Δ wee1-50*=0.0075, *chk1Δ wee1-50*=  
1066 0.0059).. (f) *spd1Δ* suppresses the synthetic lethality of *chk1Δ wee1-50*.  
1067 Strains were serially diluted and spotted onto YES plates and incubated at  
1068 indicated temperatures for 2-3 days. (g) *spd1Δ* cannot suppress the synthetic  
1069 lethality of *rad3Δ wee1-50*. A similar experiment was carried out as described  
1070 in (f).  
1071

1072 **Figure 8.** dNTP supply and demand model. Increased CDK activity (resulting  
1073 from Wee1 inactivation) increases replication origin firing leading to increased  
1074 dNTP demand (dark green box). This in turn leads to replication stalling and  
1075 to DNA integrity checkpoint activation (amber box). Checkpoint activation  
1076 leads to reduced CDK activity and to increased dNTP supply (dotted arrows)  
1077 through MBF-dependent RNR expression (light green box). Failure to  
1078 increase dNTP supply (e.g. loss of Set2, Rad3 or Chk1) when dNTP demand  
1079 is high leads to replication catastrophe (red box). See text for details.

1080

#### 1081 **SUPPLEMENTARY FIGURE LEGENDS**

1082 **Supplementary Figure 1** *wee1-50* cells are sensitive to HU. (a) Equal  
1083 amount of cells were streaked on YES or 10 mM HU and incubated at 32°C.  
1084 (b) dATP levels in *wee1-50* cells were significantly lower than wild-type cells.  
1085 dATP levels were normalised with ATP levels. The asterisk (\*) represents  
1086 significant difference compared with wild type and *wee1-50* ( $p < 0.05$ , t test).

1087

1088 **Supplementary Figure 2** Expression of different levels of human histone  
1089 demethylase in *S. pombe*. (a) 10-fold serial dilutions of wild type expressing  
1090 empty vector, hJMJD2A using three different *nmt* promoters were spotted  
1091 onto EMM minus leucine without thiamine at 36°C. (b) 10-fold serial dilutions  
1092 of wild type expressing empty vector, hFBXL11 using three different *nmt*  
1093 promoters were spotted onto EMM minus leucine without thiamine at 36°C. (c)  
1094 Western blot analysis of overexpression of FLAG-hJMJD2A levels in wild-type  
1095 cells under the control of *pREP3X*, *pREP41X* and *pREP81X* plasmids. Anti-  
1096 tubulin as a loading control. (d) Western blot analysis of overexpression of



1097 FLAG-hFBXL11 levels in wild-type cells under the control of *pREP3X*,  
1098 *pREP41X* or *pREP81X* plasmid. Anti-tubulin is shown as a loading control. (e)  
1099 Western blot analysis of hJMJD2A levels in wild-type or *wee1-50* cells  
1100 containing *pREP41x-Flag-FBXL11* plasmids.  $\alpha$ -tubulin is shown as a loading  
1101 control. (f) Western blotting analysis of hFBXL11 levels in wild-type or *wee1-*  
1102 *50* cells containing *pREP41x-Flag-FBXL11* plasmids.  $\alpha$ -tubulin is shown as a  
1103 loading control.

1104

1105 **Supplementary Figure 3** Loss of Clr4 is not essential for the viability of  
1106 *wee1-50* cells. Serial dilution of a wild-type, *wee1-50*, *clr4 $\Delta$*  and *clr4 $\Delta$  wee1-*  
1107 *50* strains were spotted onto YES medium and incubated at indicated  
1108 temperatures for 2-3 days.

1109

1110 **Supplementary Figure 4** Loss of Cdc2 function rescues the synthetic  
1111 lethality of *set2 $\Delta$  wee1-50* cells. (a) Serial dilution of a wild-type, *cdc2-as*,  
1112 *set2 $\Delta$  wee1-50* and *set2 $\Delta$  wee1-50 cdc2-as* strains were spotted onto YES  
1113 medium and incubated at indicated temperatures for 2-3 days. (b)  
1114 Quantification of the cell viability of indicated strains at 36°C.

1115

1116 **Supplementary Figure 5** *set2 $\Delta$  wee1-50* cells exhibit severe mitotic  
1117 catastrophe at later time points following Wee1 inactivation. (a) *set2 $\Delta$  wee1-*  
1118 *50* cells were grown to log phase at the permissive temperature then  
1119 transferred to the restrictive temperature for 24h. Samples of cells were  
1120 collected at indicated time points and stained with DAPI for microscopy  
1121 analysis. (b) Quantification of mitotic defects in (a).

1122

1123 **Supplementary Figure 6** *set2Δ wee1-50* cells exhibit proficient checkpoint  
1124 activation in response to HU. Cells were grown asynchronously in YES  
1125 medium and transferred to YES in the present of 10mM HU for 24h at 25°C.  
1126 Samples were taken at the indicated time points and fixed with  
1127 methanol/acetone; subsequently the fixed cells were examined by microscopy  
1128 analysis.

1129

1130 **Supplementary Figure 7** Inhibition of origin firing suppresses the synthetic  
1131 lethality of *set2Δ wee1-50* cells. (a) Set2 and Wee1 suppresses inefficient  
1132 origin firing. The genome-wide plot of origin usage in vegetative wild-type,  
1133 *set2Δ*, *wee1-50* or *set2Δ wee1-50* cells at 34°C. Origin efficiencies were  
1134 calculated from Pu-seq data. (b) Inactivation of Cdc18 at the semi-restrictive  
1135 temperature suppresses the synthetic lethality of *set2Δ wee1-50* cells (c)  
1136 Inhibition of replication factors Cdc18 or Mcm4 does not cause severe viability  
1137 loss with Wee1 inhibition in *S. pombe*. *cdc18<sup>ts</sup>* or *mcm4-tdts* is not synthetic  
1138 lethal with *wee1-50*. (d) *polE<sup>ts</sup>* is not synthetic lethal with *wee1-50*.

1139

1140 **Supplementary Figure 8** Checkpoint mutant is synthetic lethal with *wee1-50*  
1141 mutant. (a) *rad3Δ* is synthetic lethal with *wee1-50*. Serial dilution of a wild-  
1142 type, *rad3Δ*, *wee1-50* and *rad3Δ wee1-50* strains were spotted onto YES  
1143 medium and incubated at indicated temperatures for 2-3 days. (b) *hus1Δ* is  
1144 synthetic lethal with *wee1-50*. Similar experiments were carried as described  
1145 in (a). (c) *chk1Δ* is synthetic lethal with *wee1-50*. Similar experiments were  
1146 carried as described in (a). (d) *cds1Δ* is synthetic lethal with *wee1-50* at 25°C.

1147

1148 **Supplementary Figure 9** Wee1 inhibition causes pre-mature entry into  
1149 mitosis in checkpoint mutants. Percentage of septated cells flowing Wee1  
1150 inhibition in *rad3Δ*, *chk1Δ* or *set2Δ* cells.

1151

1152 **Supplementary Figure 10** *tel1Δ* is not synthetic lethal with *wee1-50*. Serial  
1153 dilution of a wild-type, *tel1Δ*, *wee1-50* and *tel1Δ wee1-50* strains were spotted  
1154 onto YES medium and incubated at 25°C or 36°C for 2-3 days.

1155

1156

a.

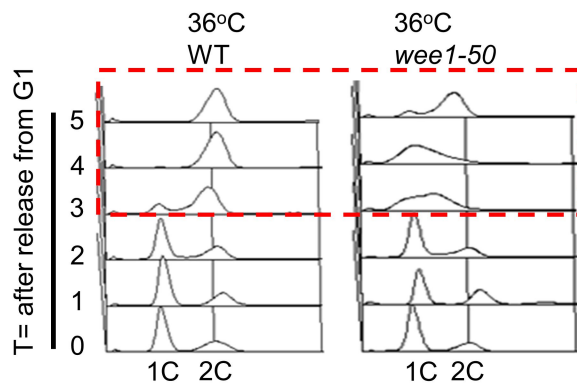

b.

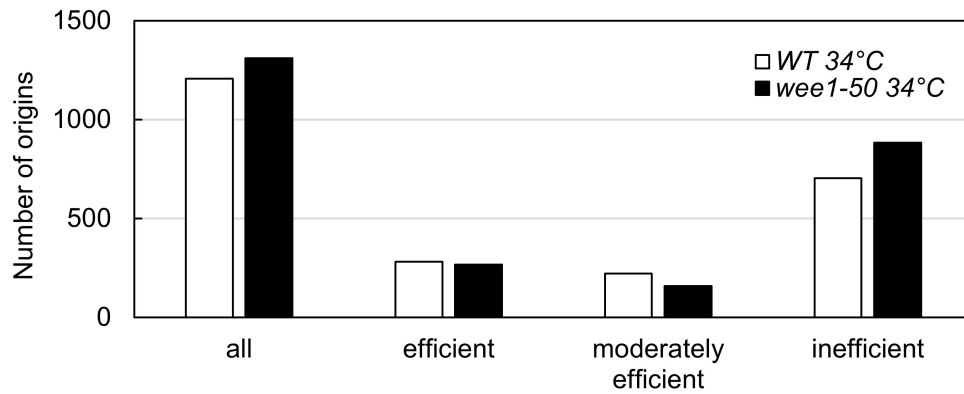

c.

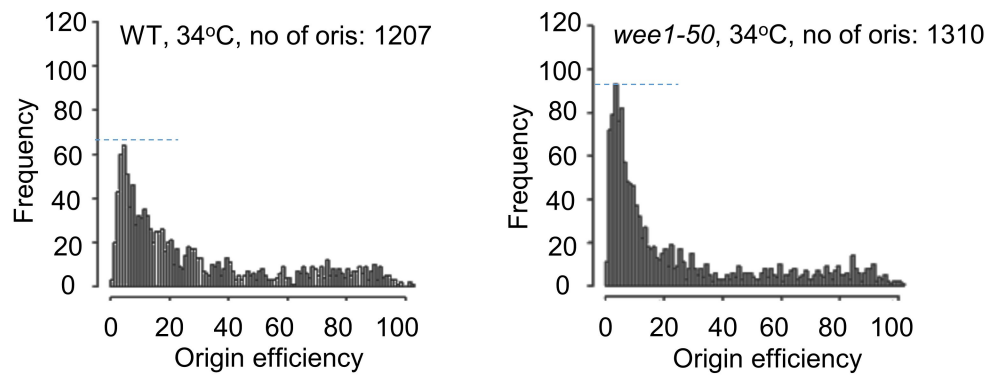

d.

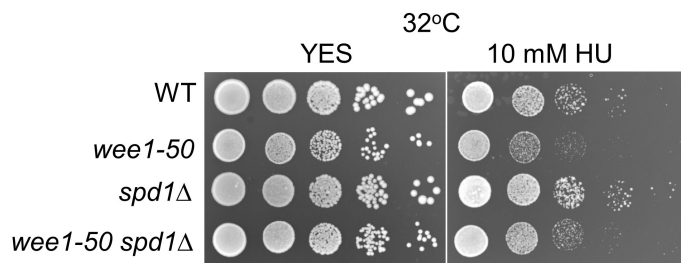

e.

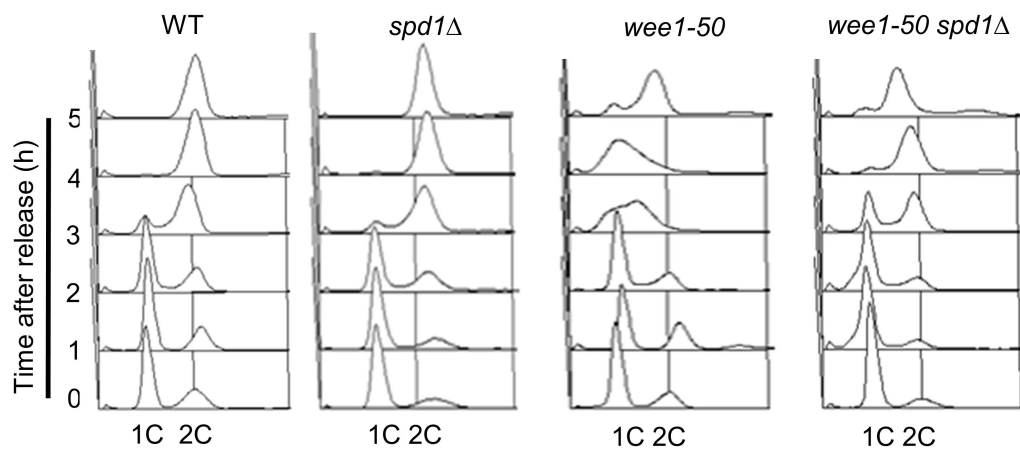

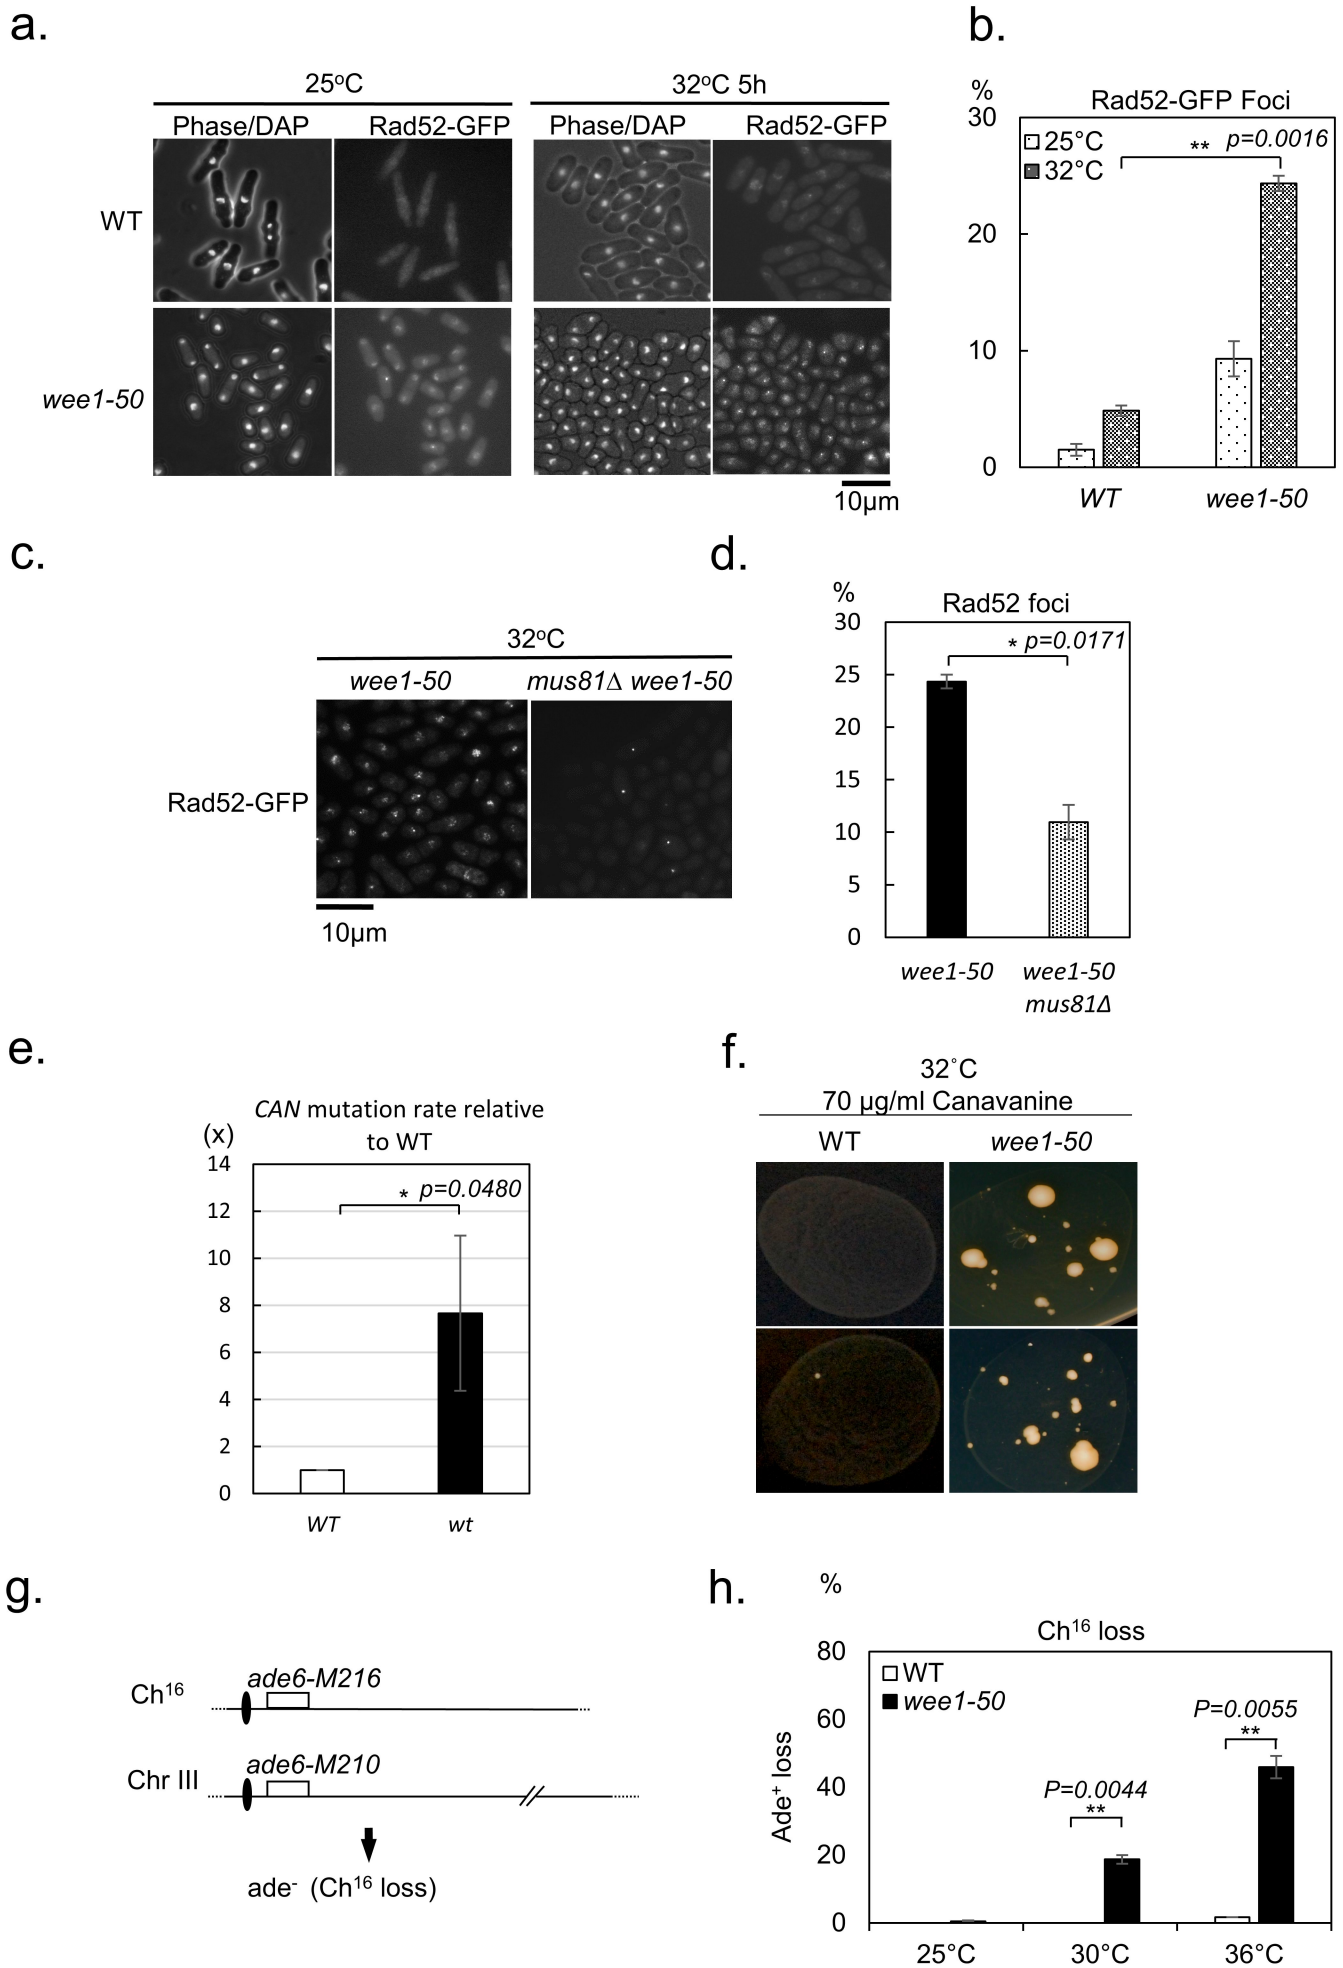

a.

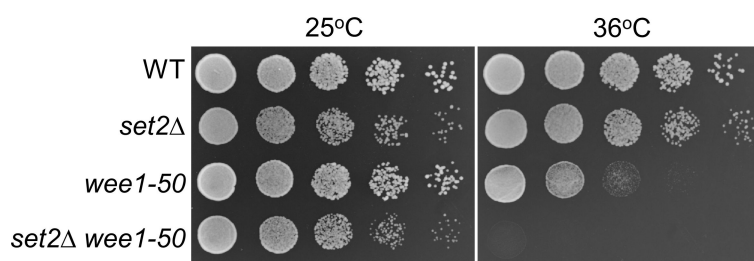

b.

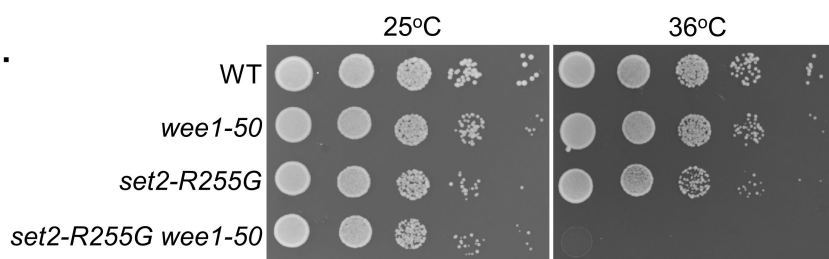

c.

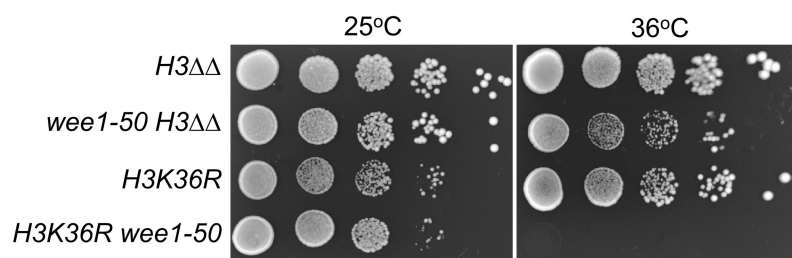

d.

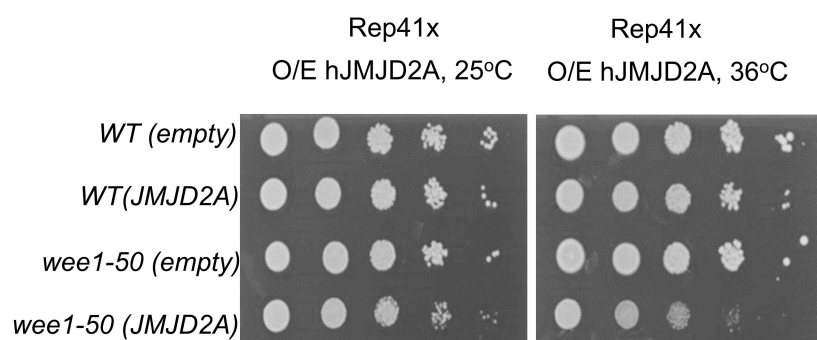

f.

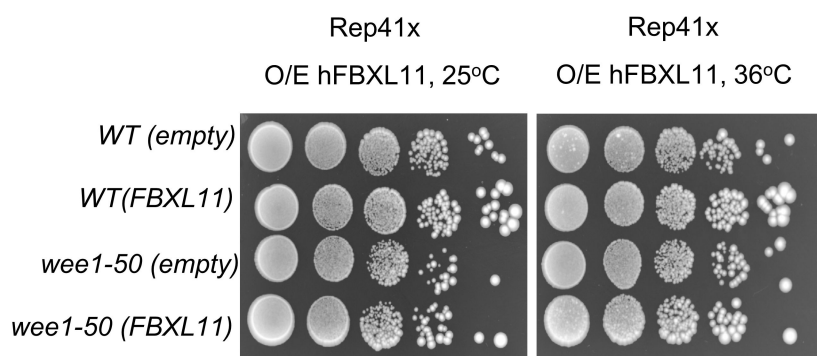

e.

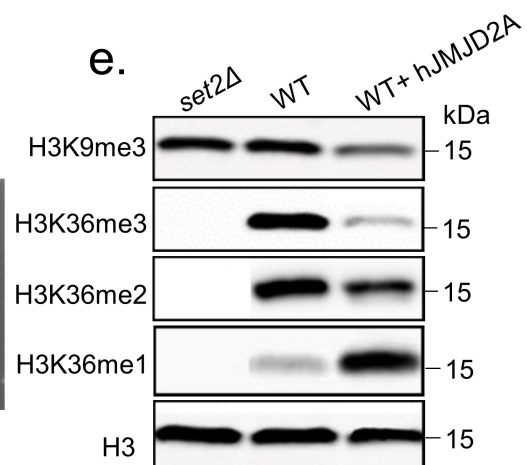

g.

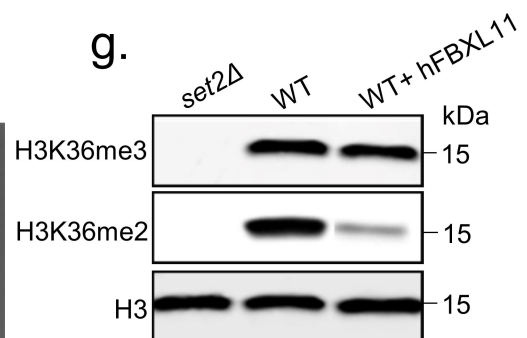

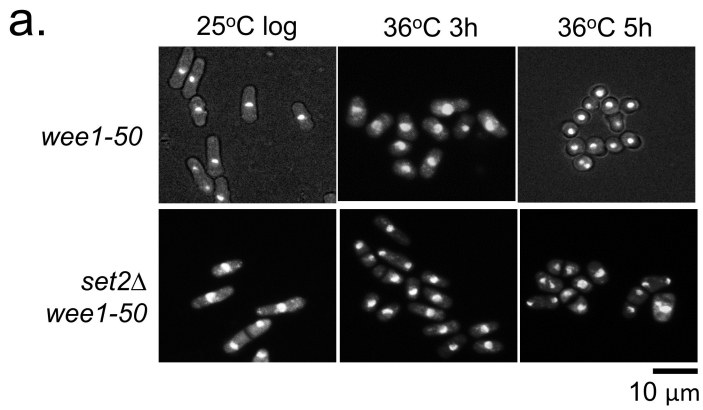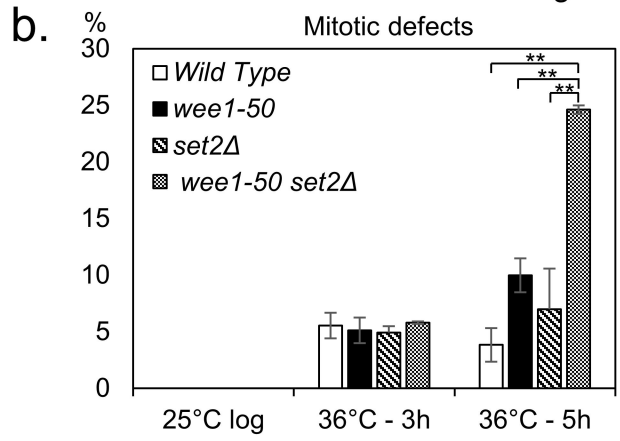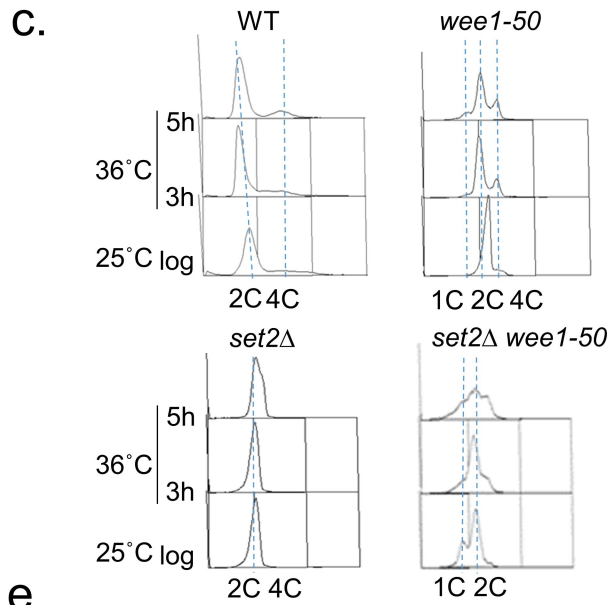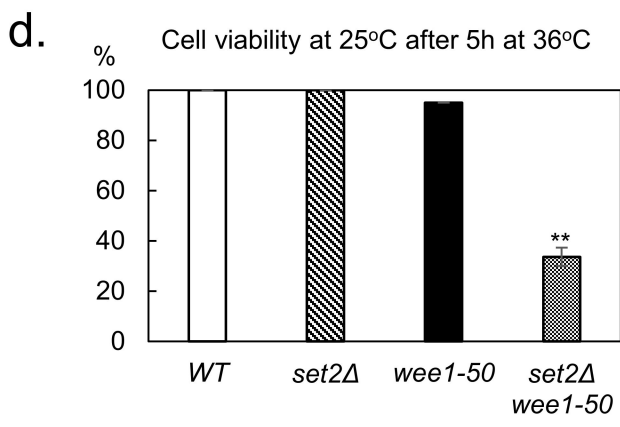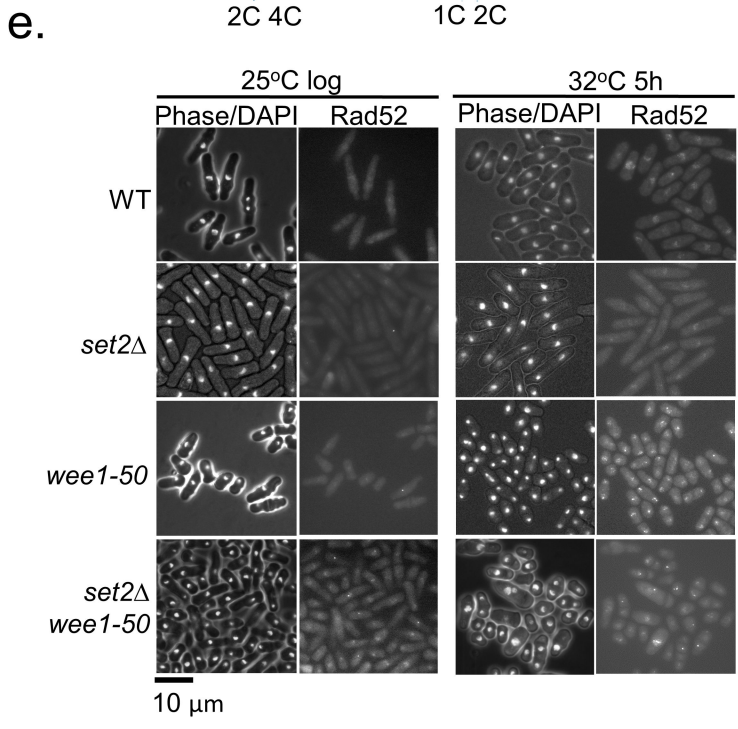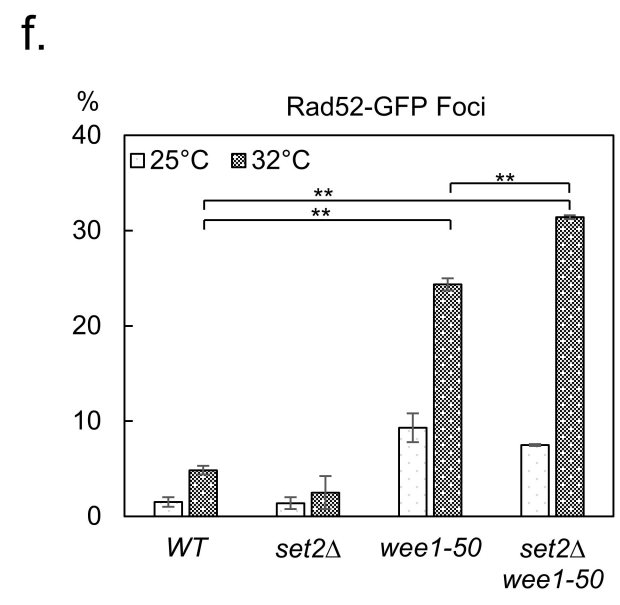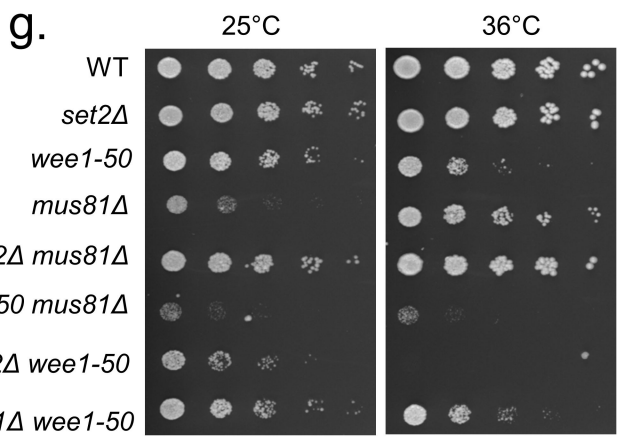

a.

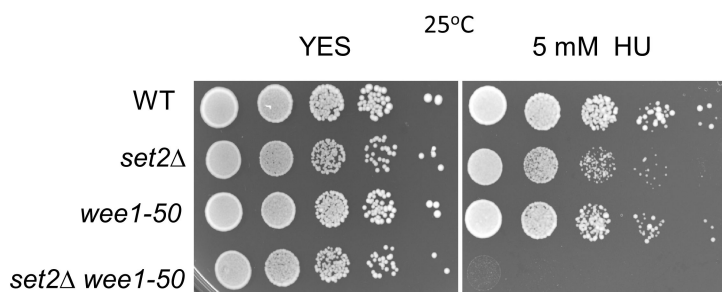

b.

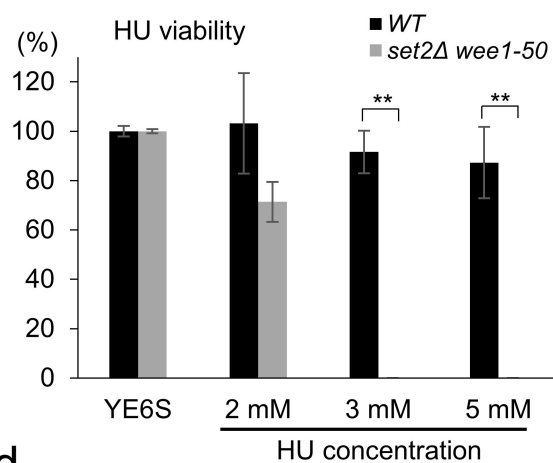

c.

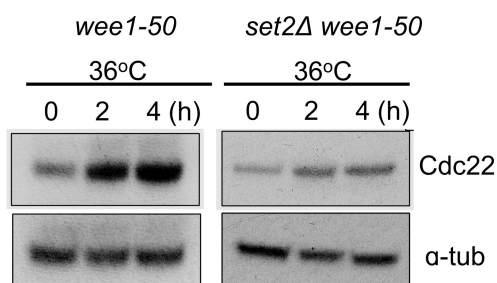

d.

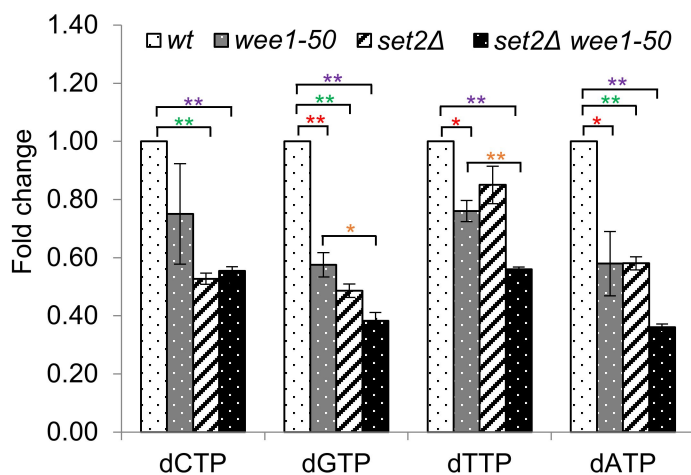

e.

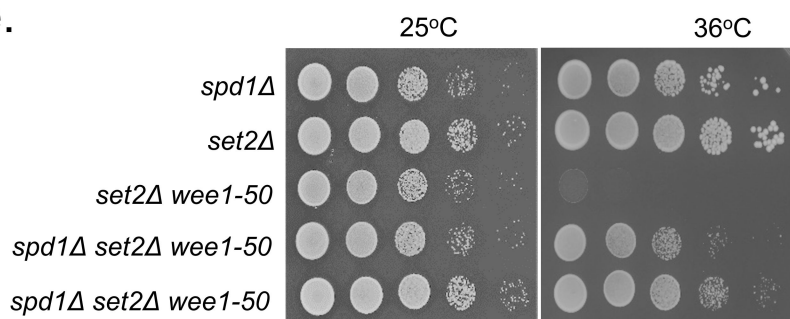

f.

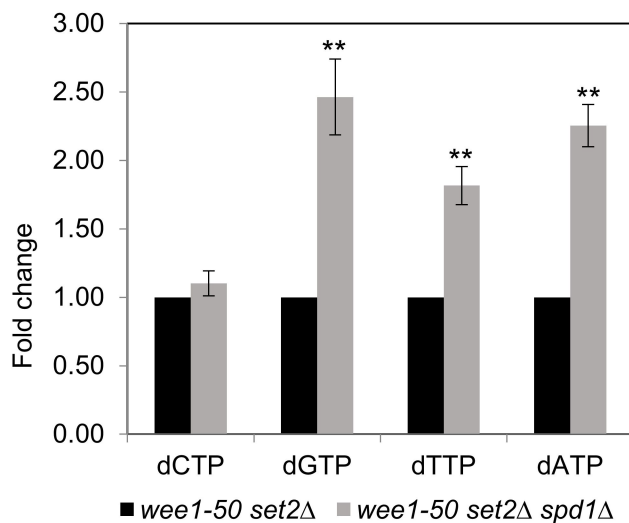



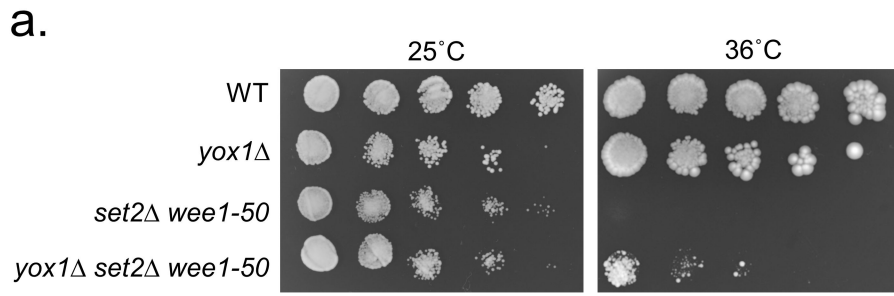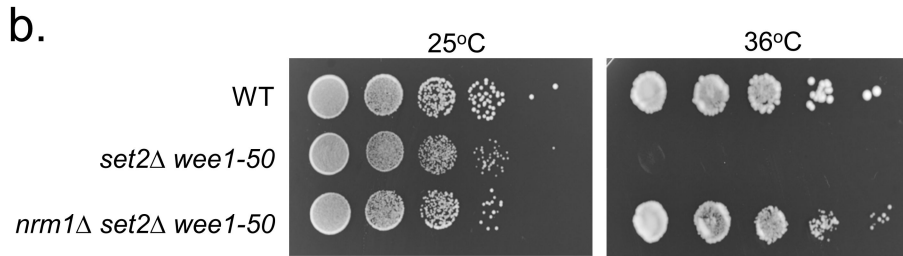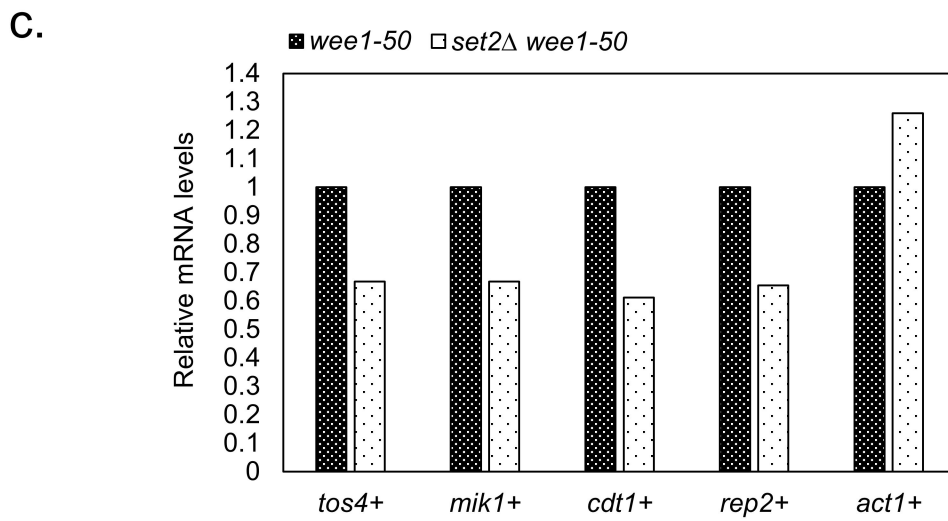

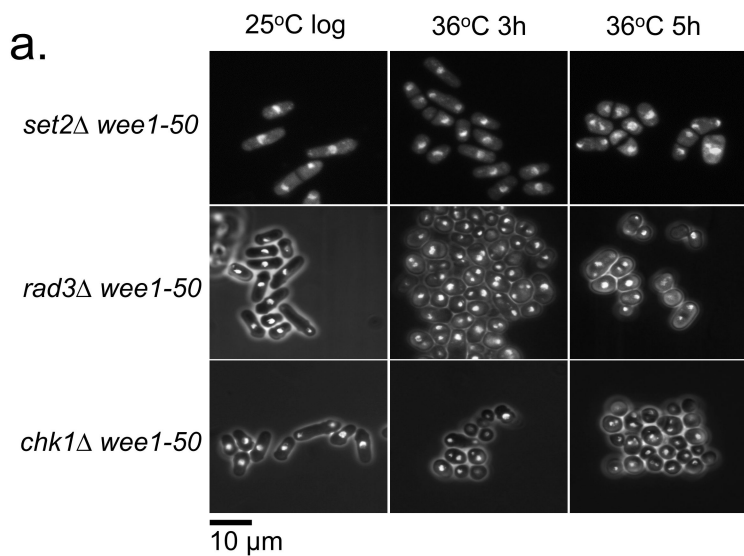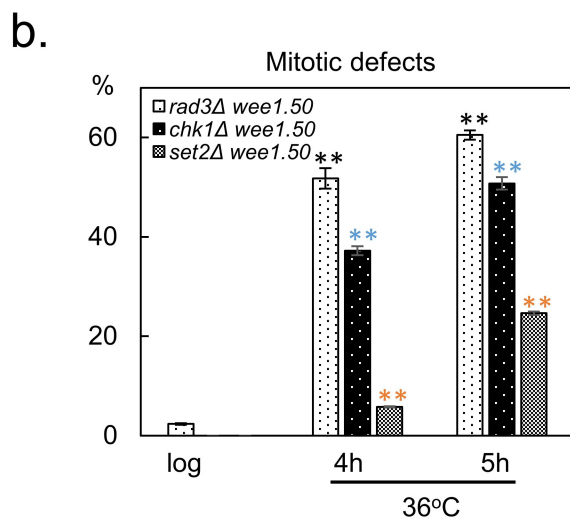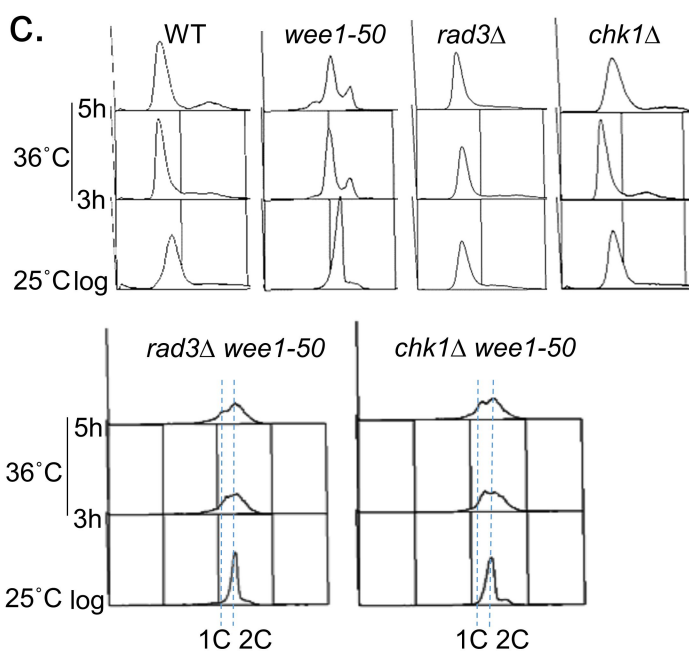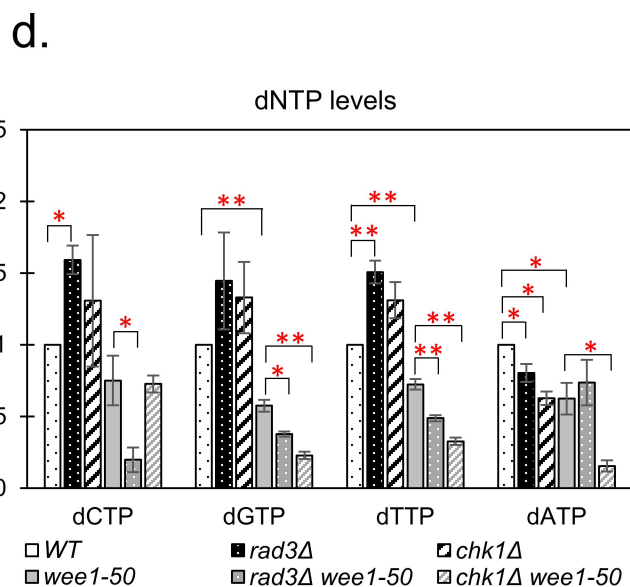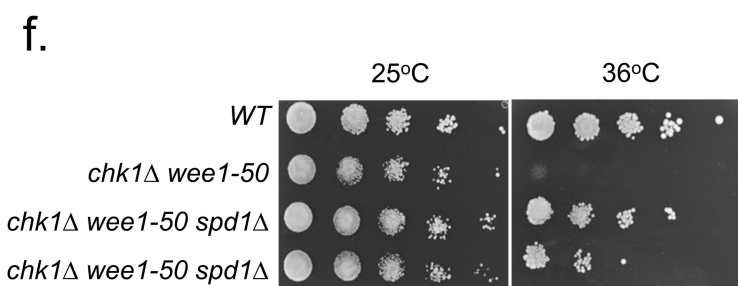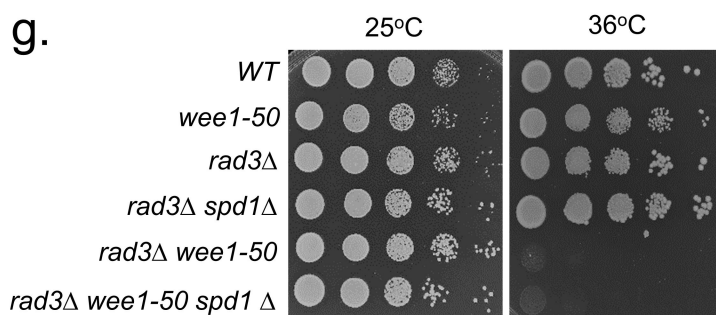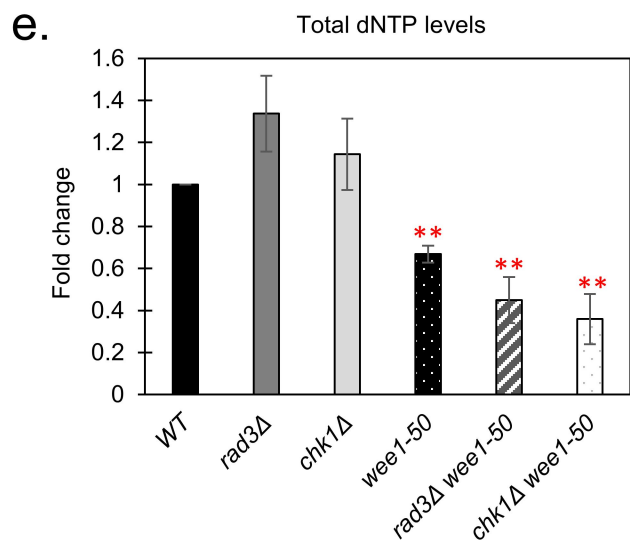

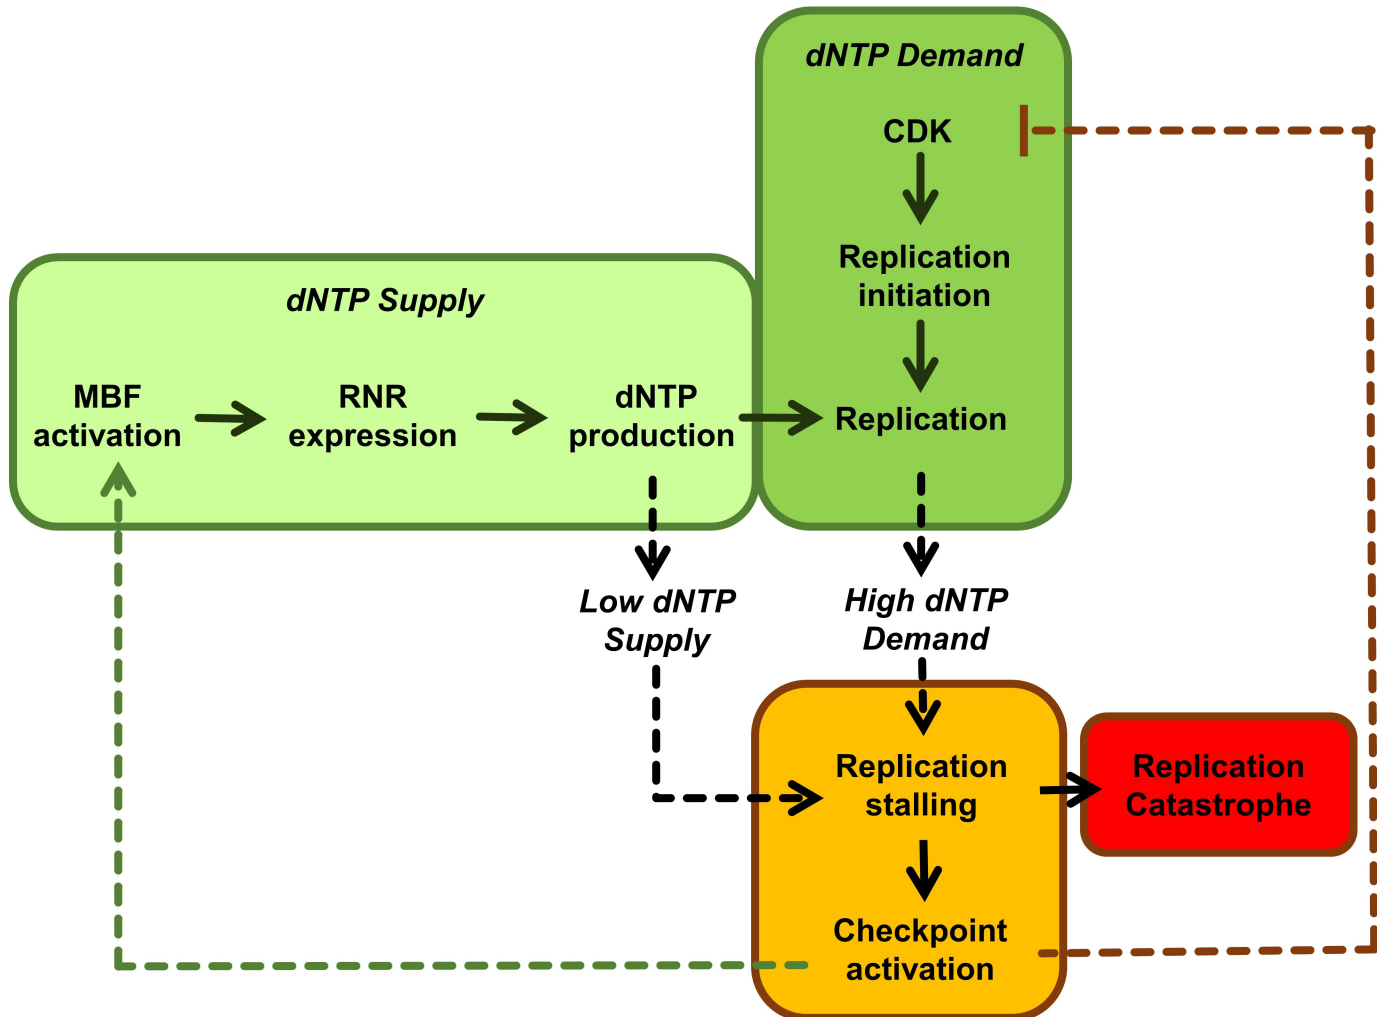

Source: https://www.biorxiv.org/content/biorxiv/early/2018/09/03/395715.full.pdf
